# TDP-43 safeguards the embryo genome from L1 retrotransposition

## Short Title

TDP-43 as a guardian of the embryonic genome

## Authors and Affiliations

Ten D. Li<sup>1</sup>, Kensaku Murano<sup>1\*</sup>, Tomohiro Kitano<sup>1</sup>, Youjia Guo<sup>1</sup>, Lumi Negishi<sup>2</sup>, Haruhiko Siomi<sup>1\*</sup>

<sup>1</sup>Department of Molecular Biology, Keio University School of Medicine, Tokyo 160-8582, Japan

<sup>2</sup>Laboratory of Chromatin Structure and Function, Institute for Quantitative Biosciences, The University of Tokyo, Tokyo 113-0032, Japan

\*Co-corresponding authors:

Kensaku Murano

Email: [kmurano@keio.jp](mailto:kmurano@keio.jp)

Haruhiko Siomi

Email: [awa403@keio.jp](mailto:awa403@keio.jp)

## Abstract

Transposable elements (TEs) are genomic parasites that propagate within the host genome and introduce mutations. Long interspersed nuclear element-1 (LINE-1 or L1) is the major TE class, which occupies nearly 20% of the mouse genome. L1 is highly active in mammalian preimplantation embryos, posing a major threat to genome integrity, but the mechanism of stage-specific protection against L1 retrotransposition is unknown. Here, we show that TAR DNA binding protein 43 (TDP-43), mutations in which constitute a major risk factor for amyotrophic lateral sclerosis (ALS), inhibits L1 retrotransposition in mouse embryonic stem cells (mESCs) and preimplantation embryos. Knock-down of TDP-43 resulted in massive genomic L1 expansion and impaired cell growth in preimplantation embryos and ESCs. Functional analysis demonstrated that TDP-43 interacts with L1 open reading frame 1 protein (L1 ORF1p) to mediate genomic protection, and loss of this interaction led to de-repression of L1 retrotransposition. Our results identify TDP-43 as a guardian of the embryonic genome.

## 30 Teaser

31 Knocking-down of TDP-43 causes massive L1 retrotransposition in preimplantation embryos.

32

## 33 Keywords

34 L1, TDP-43, preimplantation embryogenesis

35

## 36 Introduction

37 After fertilization, mammalian zygotes undergo preimplantation embryogenesis during which a series of  
38 rapid and synchronous cell cycles give rise to blastocysts that are competent for implantation and development  
39 (1, 2). A key step in preimplantation embryogenesis is the commencement of zygotic gene activation (ZGA) and  
40 the establishment of totipotency, which is accompanied by a burst of transposable element (TE) expression (3-  
41 5). The activation of TEs during ZGA has been hypothesized to be related to chromatin opening and early gene  
42 expression; however, TE activity poses a dire threat to genome integrity due to the random integration of these  
43 elements into new genomic loci.

44 Continuous TE expansion has generated more than one third of the mouse genome, with long interspersed  
45 nuclear element-1 (LINE-1, L1) transposons representing the most abundant TE class. L1 elements constitute 19%  
46 of the mouse genome and propagate through a “copy and paste” genetic mechanism known as retrotransposition  
47 (6). More than 900,000 L1 sequences are found in the mouse genome (7), of which approximately 3,000 are still  
48 retrotransposition-competent (8-10). A retrotransposition-competent L1 consists of a 5' UTR, two open reading  
49 frames (ORF1 and ORF2), and a 3' UTR that ends with poly-A sequence (11). The retrotransposition of L1  
50 occurs via target-site primed reverse transcription (TPRT) (12). The L1 mRNA directs translation of two proteins,  
51 L1 ORF1p and L1 ORF2p, which correspond to the two open reading frames respectively (11). In the cytoplasm,  
52 L1 ORF1p mediates ribonucleoprotein (RNP) formation of L1 mRNA, L1 ORF1p, and L1 ORF2p through its  
53 RNA binding and molecular chaperone activities (13, 14). The RNP complex is imported into the nucleus, where  
54 L1 mRNA is used as a template to generate cDNA through reverse-transcriptase (RT) activity of L1 ORF2p (15).  
55 Finally, retrotransposition is achieved by ligation of the cDNA with genomic DNA that bears a single-strand  
56 break created by endonuclease (EN) activity of L1 ORF2p (16). It has been shown that some diseases including  
57 certain types of cancer, hemophilia A/B, and severe combined immunodeficiency (SCID) can be caused by  
58 deleterious L1 insertions (17). Due to their high potential for mutagenicity, L1 loci are stringently silenced by

59 repressive epigenetic modifications in most tissues (18). However, the erasure of epigenetic modifications that  
60 occurs in preimplantation embryos results in extensive L1 activation, which jeopardizes genome integrity (4, 18).  
61 Interestingly, while preimplantation embryos are abundantly loaded with L1 RNP complexes (5), how they  
62 counteract L1 retrotransposition remains completely unclear.

63 TAR DNA-binding protein 43 (TDP-43) was first identified as a transcriptional regulator that suppresses  
64 human immunodeficiency virus type 1 (HIV-1) gene expression and protects against viral infection (19). Previous  
65 studies have shown that TDP-43 is an RNA-binding protein with several functions including mRNA transcription,  
66 translation, splicing and stability (20, 21). Screening of amyotrophic lateral sclerosis (ALS) risk factors showed  
67 that ectopic expression of TDP-43 is associated with reduced L1 retrotransposition activity in reporter system  
68 using HEK293T cells (22). In *Drosophila*, TDP-43 over-expression or knock-out (KO) appear to impair the  
69 Dicer-2/Ago2-mediated siRNA silencing system (23). However, a causality role of TDP-43 in L1 neutralization  
70 *in vivo*, particularly in preimplantation embryos where genomic integrity is cardinal important, has not been  
71 identified.

72 Here, we found that TDP-43 interacts with L1 ORF1p in mouse embryonic stem cells (mESCs) and inhibits  
73 embryonic L1 retrotransposition. Our results suggest that TDP-43 acts as a guardian against L1 exposure during  
74 preimplantation embryogenesis and safeguards genomic integrity.

75

## 76 **Results**

### 77 **TDP-43 interacts with L1 ORF1p and inhibits L1 retrotransposition**

78 We sought to characterize L1 retrotransposition inhibition during preimplantation development by  
79 identifying proteins that interact with factors required for L1 retrotransposition. L1 ORF1p is essential for L1  
80 retrotransposition (14) and is highly expressed in preimplantation embryos (5). We raised mouse monoclonal  
81 antibodies against mouse L1 ORF1p (**Fig. 1A, fig. S1A**) and confirmed expression of L1 ORF1p in mESCs and  
82 preimplantation embryos (**Fig. 1, B and C**). L1 ORF1p is evident in foci throughout the embryo as well as evenly  
83 distributed near the cell membrane (**Fig. 1C, fig. S1, B and C**). In mESC cultures, 2-cell embryo like (2C-like)  
84 cells comprise less than 1% of the population and are a rare and transient population with totipotent features (24).  
85 While ESCs correspond to the inner cell mass (ICM) of the blastocyst, 2C-like cells have transcriptomic profiles  
86 resembling those of 2C-stage embryos, which highly express a 2C-specific TE, mouse endogenous retrovirus  
87 with leucine tRNA primer (MERVL) (24), as well as L1. Immunofluorescence staining of L1 ORF1p and

88 MERVL group-specific antigen (Gag) in mESCs showed that L1 ORF1p and MERVL Gag are both highly  
89 expressed and localize in the cytoplasm of 2C-like cells (**Fig. 1B**).

90 Dux is a transcription factor that activates 2C specific genes during embryogenesis, and ESCs with ectopic  
91 expression of Dux acquire a 2C-like state (25). To assess the consequences of Dux expression on retrotransposon  
92 protein expression, we established a Dux-inducible mESC line mES::TRE-3FLAG-Dux (**Fig. 1D**). The  
93 expression levels of MERVL Gag and L1 ORF1p in mES::TRE-3FLAG-Dux increased with Dux expression in  
94 a dose-dependent manner upon doxycycline treatment (**Fig. 1, D and E**).

95 Next, L1 ORF1p-associated complexes were immunopurified (IP) from Dux-induced 2C-like cells (**Fig.**  
96 **2A**) and subjected to liquid chromatography-tandem mass spectrometry (LC-MS/MS) to identify their  
97 components (**Supplemental Table 1**). As expected, L1 ORF1p was highly enriched in the immunopurified  
98 samples. Among the identified L1 ORF1p interactome, eight highly enriched proteins were selected empirically  
99 for further investigation, and an interacting protein below our significance threshold, Gm21312, was chosen as  
100 control (**Fig. 2B**).

101 We then performed L1 retrotransposition assays (26, 27) in the presence of the selected interactors to  
102 examine whether these proteins are capable of inhibiting L1 retrotransposition (**Fig. 2C**). Briefly, the bivalent L1  
103 reporter plasmid encodes a transposition-competent L1 followed by an anti-sense EGFP cassette interrupted by  
104 a sense intron. Upon L1 transcription, the intron in EGFP is spliced and the processed mRNA containing an intact  
105 anti-sense EGFP cassette can be reverse transcribed and insert into the host genome, leading to EGFP-positive  
106 cells that have undergone retrotransposition and can be detected by flow cytometry. To validate that this assay  
107 can be used to detect retrotransposition inhibition in HEK293T cells, we confirmed a dose-dependent decrease  
108 in retrotransposition frequency upon administration of tenofovir, which specifically inhibits reverse transcription  
109 (**fig. S2, A and B**, also see details in **Materials and Methods**). This retrotransposition assay was performed in  
110 HEK293T cells with ectopic expression of cDNAs encoding the selected L1 ORF1p-interacting proteins (**fig.**  
111 **S2C**). Retrotransposition frequency, as measured by the EGFP-positive cell population, was markedly decreased  
112 in cells transfected with the plasmid expressing *Tardbp*, which encodes the protein TDP-43 (**Fig. 2D, fig. S2D**).  
113 In contrast, over-expression of TDP-43 did not affect the splicing and expression of the reporter gene (**fig. S2, E**  
114 **and F**). Co-IP followed by western blotting (WB) in doxycycline treated mES::TRE-3FLAG-Dux cells (**Fig. 2E**)  
115 confirmed that TDP-43 is a *bona fide* interactor of L1 ORF1p.

116

## 117 **Zygotic TDP-43 knock-down leads to increased L1 retrotransposition and developmental defects**

118 As we found that TDP-43 inhibits L1 retrotransposition *in vitro*, we next investigated its role during  
119 preimplantation development. We first analyzed previously published single-cell RNA-seq data (28) to determine  
120 the preimplantation expression profiles of *Tardbp* and entire L1 family in mouse embryos (**fig. S3, A and B**).  
121 While *Tardbp* and L1 family are both maternally inherited, *Tardbp* transcripts are drastically depleted at the mid-  
122 2C stage before being progressively induced, whereas L1 family transcripts gradually increase after fertilization  
123 and reach their maximum level at the mid-to-late 2C stage. We raised monoclonal antibodies against TDP-43,  
124 and immunofluorescence staining of different stages of mouse embryos showed that TDP-43 is enriched in the  
125 nucleus (**Fig. 3A, fig. S3C**).

126 We then asked whether TDP-43 safeguards preimplantation embryos against L1 retrotransposition. TDP-43  
127 knock-down (KD) was performed by microinjecting siRNA against *Tardbp* (si*Tardbp*) into male zygote pronuclei.  
128 TDP-43 was undetectable by immunofluorescence staining in si*Tardbp* embryos, and RNA-seq showed that  
129 *Tardbp* levels decreased to less than 20% of control morulae (siScramble) (**Fig. 3, A and B**). Although TDP-43  
130 KD embryos seemed to have undergone normal developmental progression at 4.5 days post-coitum (dpc) based  
131 on embryo staging (**fig. S3, D and E**), the volume of TDP-43 KD embryos was nearly half that of control embryos  
132 (**fig. S3F**), suggesting severe cell growth defects. Strikingly, quantitative PCR (qPCR) using whole-genome-  
133 amplified (WGA) DNA from TDP-43 KD blastocysts (4.5 dpc) revealed significant increases in DNA amount  
134 of L1 A, G<sub>F</sub>, and T<sub>F</sub> subfamilies (**Fig. 3C**), which have been reported to be evolutionarily young and  
135 retrotransposition-competent (8-10, 29, 30) (**fig. S3G**). RNA-seq similarly showed that expression of active L1  
136 was broadly upregulated in TDP-43 KD embryos (**Fig. 3D, fig. S3H, Supplemental Table 2**). To corroborate  
137 the findings, we performed targeted enrichment sequencing of L1 insertions by TIP-seq (31) using WGA DNA,  
138 which had no bias concerning amplifying  $\beta$ -actin gene on chromosome 5 at least (**fig. S3, I and J**, also see  
139 **Materials and Methods**). We identified an almost 70% increase in putative *de novo* L1 insertions in TDP-43  
140 KD embryos (4.5 dpc) compared to controls (4.5 dpc) (**Fig. 3E, Supplemental Table 3**). The raw sequence data  
141 from TIP-seq analysis showed that L1s of different origins were retrotransposed to A-rich regions on  
142 chromosomes as previously described (11). These loci might provide hot spots for L1 retrotransposition during  
143 preimplantation embryogenesis in the context of TDP-43 depletion (**fig. S3K**). A smaller number of L1 insertions  
144 unique to control embryos were also identified, suggesting a basal frequency of L1 retrotransposition that  
145 naturally occurs during embryogenesis (32) which may be modified by strain-specific genome sequences or

146 whose identification may be limited by statistical power (**Supplemental Table 4**). Together, the DNA expansion  
147 and increased expression of active L1 in TDP-43 KD embryos indicate that TDP-43 is required to suppress L1  
148 retrotransposition during early embryogenesis.

149

### 150 **TDP-43 mutations in mESCs results in increased L1 retrotransposition**

151 That TDP-43 KO causes embryonic lethality (33) prevents investigation of effects of prolonged TDP-43  
152 depletion on L1 retrotransposition *in vivo*, so we next asked whether TDP-43 is also responsible for inhibiting  
153 L1 retrotransposition in mESCs, which recapitulate preimplantation embryos and are readily amendable to  
154 genetic manipulation. We confirmed that endogenous TDP-43 is abundantly expressed in mESCs and can be  
155 transiently knocked down using siRNA against *Tardbp* (siTardbp) (**fig. S4A**). We performed the  
156 retrotransposition assay in mESCs subjected to TDP-43 KD and found roughly 30% increased retrotransposition  
157 frequency, while TDP-43 KD did not affect the splicing of the reporter gene (**Fig. 4A, fig. S4B**). We then  
158 attempted to investigate the consequences of prolonged TDP-43 removal on L1 retrotransposition by KO TDP-  
159 43 in mESCs using CRISPR/Cas9. Four gRNAs targeting the area just downstream of the start codon of *Tardbp*  
160 (**Fig. 4B**) were designed and cloned into expression plasmids with Cas9 and a puromycin resistance cassette.  
161 mESCs were transfected with the plasmids and subjected to puromycin selection, resulting in three clones (#3,  
162 #11, #14) with decreased growth rates compared to wild type mESCs (**fig. S4C**). Genotyping showed that instead  
163 of complete KO, TDP-43 in these clones lacks the first 84 amino acids due to exon 2 skipping, and is instead  
164 translated from an alternative start codon in exon 3 (**fig. S4D**), resulting in a TDP-43  $\Delta$ N mutant (**Fig. 4B**). These  
165 three mutant clones all have identical mRNA sequence but different genomic DNA sequences (**fig. S4D**). The  
166 cDNA of  $\Delta$ N mutant was cloned and over-expressed in mESCs and confirmed to be the same size as the product  
167 detected in  $\Delta$ N mutant cell lines (**fig. S4E**). Despite the continued presence of the truncated TDP-43 protein, the  
168 DNA amount of active L1 subfamilies increased by around 20% to 40% in TDP-43  $\Delta$ N mutant clones (**Fig. 4C**).  
169 Moreover, we performed immunofluorescence staining of wild type mESCs and  $\Delta$ N mutant cell lines, and found  
170 that the fluorescence signal of L1 ORF1p is significantly higher in the nucleus (**fig. S4F**), with a concomitant  
171 increase in L1 ORF1p expression (**fig. S4G**). TDP-43 contains a bipartite nuclear localization signal (NLS)  
172 domain (81-87 amino acids and 94-100 amino acids) (34). The  $\Delta$ N mutant of TDP-43 localized to the nucleus  
173 despite of lacking a part of the domain (**fig. S4, D and F**), indicating that remaining NLS domain might be

174 exposed and functional in the  $\Delta N$  mutant. In addition to confirming that TDP-43 inhibits L1 retrotransposition  
175 in mESCs, these results suggest that the N terminal domain of TDP-43 is important for this function.

176

### 177 **Interaction with L1 ORF1p is required for TDP-43-mediated L1 retrotransposition inhibition**

178 We then sought to unveil the structural basis of TDP-43-mediated L1 retrotransposition inhibition. TDP-43  
179 consists of an N terminal domain that contributes to homo-polymer formation, a NLS domain, two RNA  
180 recognition motif (RRM) domains, and a disordered C terminal domain which harbors the majority of ALS-  
181 associated mutations that map to the gene (35, 36) (**Fig. 5A**). As the TDP-43  $\Delta N$  mutant in mESCs causes de-  
182 repression of L1 retrotransposition, we first asked whether the N terminal domain of TDP-43 mediates its  
183 interaction with L1 ORF1p. As expected, the ability of TDP-43 expression to inhibit L1 retrotransposition was  
184 impaired in the  $\Delta N$  mutant (**Fig. 5B, fig. S5A**), with a corresponding decrease in enrichment of the TDP-43  $\Delta N$   
185 mutant in the L1 ORF1p co-IP compared to wild type TDP-43 (**Fig. 5C**). We also confirmed that the interaction  
186 between L1 ORF1p and TDP-43 is independent of the presence of RNA (**fig. S5B**). We then sought to identify  
187 the functional domain responsible for inhibiting L1 retrotransposition using three TDP-43 mutants:  $\Delta C$  mutant  
188 deleted for amino acids 262 to 414, RRM mutant with F147/149L substitutions which have been shown to  
189 compromise RNA binding (35), and NLS mutant with K82/84A substitutions (22) which impairs its unclear  
190 localization in the context of the full-length protein (**Fig. 5A**). Co-IP experiments in HEK293T cells showed that  
191 the RRM mutant was vastly enriched for binding to L1 ORF1p, while no significant change in enrichment of the  
192  $\Delta C$  or NLS mutants was observed (**Fig. 5D**). The L1 retrotransposition assay in HEK293T cells revealed that  
193 deletion of the C terminal domain severely compromised the ability of TDP-43 to inhibit L1 retrotransposition,  
194 while the RRM mutant and the NLS mutant maintained their inhibitory capacity (**Fig. 5E, fig. S5C**). Consistent  
195 with our results in mESCs and mouse embryos, wild type TDP-43 was localized to the nucleus, and L1 ORF1p  
196 was found throughout the cytoplasm (**Fig. 5F**); as expected, the NLS mutant failed to enter the nucleus and  
197 instead co-localized with L1 ORF1p in the cytoplasm. Interestingly, both wild type and NLS mutant TDP-43  
198 repressed L1 retrotransposition effectively, and no correlation between steady-state subcellular localization and  
199 L1 inhibition ability was observed (**Fig. 5, E and F**). Together, these results indicate that the N terminal domain  
200 of TDP-43 mediates its interaction with L1 ORF1p and plays an important role in L1 retrotransposition inhibition,  
201 and the C terminal domain of TDP-43 is critical only for repressing L1 retrotransposition (**Fig. 5G**). These results

202 also suggest that steady-state subcellular location of TDP-43 may not be critical for L1 repression as far as it  
203 interacts with L1 ORF1p.

204

## 205 **Discussion**

206 Preimplantation embryogenesis and gametogenesis are the two major reprogramming events of the  
207 mammalian life cycle (18, 37). These events are accompanied by “bursts” of TE expression (3, 37-39). While it  
208 has been established that primordial germ cells (PGCs) secure genome integrity by exploiting the PIWI-piRNA  
209 pathway to repress TEs (40), it has remained unknown how the embryonic TE burst is inhibited, especially during  
210 the earliest preimplantation stages. We have addressed this fundamental question by discovering TDP-43  
211 mediated L1 retrotransposition inhibition in mouse preimplantation embryos (**Fig. 1-3**). Our data show that the  
212 C terminal domain of TDP-43 is essential for this function and that the N terminal domain of TDP-43 is required  
213 for its interaction with L1 ORF1p (**Fig. 5**). Indeed, we found that DNA amounts of active L1 subfamilies  
214 increased in mESCs endogenously expressing TDP-43  $\Delta$ N mutant protein, with a concomitant increase in L1  
215 ORF1p expression (**Fig. 4, fig. S4**). Our results suggest a model in which TDP-43 safeguards the embryonic  
216 genome by intercepting L1 RNP complexes approaching the chromosome.

217 Although most of the retrotransposons are severely truncated or silenced, we showed that L1 is  
218 transposition-competent during early stages of embryogenesis. Evidently, we have observed a marked increase  
219 in genomic-integrated L1 copy numbers upon TDP-43 KD (**Fig. 3E, fig. S3K**). However, the possibilities that  
220 the increase of L1 DNA may come from cytoplasmic cDNA, episomal cDNA circles or RNA/DNA hybrids  
221 stalled after first strand synthesis (41) cannot be excluded. Accumulation of cytoplasmic L1 cDNA intermediates  
222 may trigger cGAS-STING activity (42), leading to an inflammatory response, which may result in reduced size  
223 of blastocyst (**fig. S3F**). There is growing evidence implicating that type-I interferon (IFN-I) response can be  
224 stimulated by increasing of cytoplasmic L1 cDNA in age-associated diseases (43). Moreover, in Aicardi-  
225 Goutières Syndrome (AGS), an exonuclease Trex1 deficient disease, elevated L1-derived ssDNA level also  
226 contributes to abnormal activation of immune response (44). Given that the last step of retrotransposition is  
227 speculated to occur within the nucleus; therefore, the transport mechanism of the cDNA intermediates to the  
228 cytoplasm remains unclear.

229 TDP-43 is a highly conserved and ubiquitously expressed protein which belongs to the heterogeneous  
230 nuclear ribonucleoprotein (hnRNP) family (45). TDP-43 is an RNA-binding protein with several functions



231 including mRNA transcription, translation, splicing and stability (20, 21). As shown in **fig. S2E** and **fig.**  
232 **S4B**, KD/over-expression of TDP-43 did not affect the splicing and expression of the reporter gene, suggesting  
233 that TDP-43 does not suppress L1 retrotransposition via splicing and translation during embryogenesis. Loss of  
234 nuclear TDP-43 has been reported to be associated with chromatin de-condensation around L1 loci and increased  
235 L1 DNA content in the context of neuropathology, suggesting that TDP-43 promotes heterochromatin formation  
236 around L1 loci and represses L1 transcription (46). However, the heterochromatin-mediated transcriptional  
237 silencing is an unlikely mechanism of L1 repression since L1 is highly transcribed in preimplantation embryos.  
238 At this stage, there must be a post-transcriptional repression mechanism rather than pre-transcriptional repression  
239 by heterochromatinization.

240 Mutations of TDP-43 have been found to be highly associated with ALS (36). Although ALS is frequently  
241 associated with elevated L1 activity (47, 48), the causal relationship among TDP-43 mutations, L1  
242 retrotransposition, and ALS pathology is under debate (22, 23, 47, 48). Interestingly, ALS-associated mutations  
243 in TDP-43 are highly enriched in its C terminal domain (36), which is critical for L1 retrotransposition inhibition.  
244 However, most mutations had no significant effect on the reporter gene assay in HEK293T cells (22). Our  
245 findings that TDP-43 deficiency leads to massive L1 retrotransposition and severely impairs embryonic growth  
246 suggest a model in which ALS pathology may be the consequence of cumulative L1 retrotransposition caused by  
247 TDP-43 dysfunction over time. Indeed, the impaired mESC growth rate and reduced blastocyst size upon TDP-  
248 43 depletion may be consequences of genome instability caused by massive L1 retrotransposition, though TDP-  
249 43 is a multi-functional protein. It was previously found that TDP-43 KO embryos fail to develop beyond 8.5  
250 dpc (33). Whether the expansion of L1 causes embryonic lethality in TDP-43 KO embryos remain to be  
251 investigated, as does its direct role in ALS pathology.

252 We have confirmed that the interaction between TDP-43 and L1 ORF1p is critical for retrotransposition  
253 inhibition, but the exact mechanism is unclear. It remains to be determined whether TDP-43 can inhibit the  
254 enzymatic activities of L1 ORF2p or physically insulates L1 RNP from approaching the chromosome, or  
255 promotes the degradative processing of L1 RNA.

256

## 257 **Materials and Methods**

### 258 **LC-MS/MS data**

259 **See Supplemental Table 1**

260 **RNA-seq data of mouse embryos**

261 See **Supplemental Table 2**

262 **Somatic L1 coverage of TIP-seq**

263 See **Supplemental Table 3**

264 **Germline L1 coverage of TIP-seq**

265 See **Supplemental Table 4**

266 **Plasmids used in this study**

267 See **Supplemental Table 5**

268 **PCR primers used in this study**

269 See **Supplemental Table 6**

270

271 **Method details**

272 **Monoclonal antibody production**

273 8-week-old female BALB/c mice were immunized every two weeks for a total of six times, then boosted  
274 twice in a week. 50 µg antigen was prepared with equal volume of TiterMax Gold adjuvant (Sigma-Aldrich)  
275 according to the manufacturers' instructions. Four days after boosting, splenocytes of immunized mice were  
276 collected and fused with SP2/O myeloma using electro cell fusion generator ECFG21 (Nepa Gene) according to  
277 the manufacturers' instructions. The fused cells were cultured in GIT/IL-6/HAT medium (GIT medium  
278 (FUJIFILM Wako) supplemented with 1 ng/mL recombinant human interleukin-6 (IL-6) (PeproTech), HT  
279 supplement (Gibco) and 0.4 µM aminopterin (Sigma-Aldrich)) for one week to select hybridomas. We performed  
280 ELISA, WB and IP to screen hybridomas using culture supernatant. Serial dilution was performed to monoclonize  
281 selected hybridomas. Monoclonal hybridomas were cultured in GIT medium (FUJIFILM Wako) supplemented  
282 with 1 ng/mL IL-6 for antibody production. The isotype of antibodies was determined using IsoStrip Mouse  
283 Monoclonal Antibody Isotyping Kit (Roche). The animal experiments were approved by the Animal Care and  
284 Use Committee of Keio University and were conducted in compliance with Keio University Code of Research  
285 Ethics.

286 **Cell culture**

287 SP2/O myeloma and primary clones were cultured in GIT medium (FUJIFILM Wako) supplemented with  
288 1 ng/mL IL-6 (PeproTech) under 5% CO<sub>2</sub> at 37°C. The cells were subcultured every day to maintain cell density

289 at  $0.2\sim 1.0 \times 10^6$  cells/mL. For monoclonal antibody production, hybridomas were cultured until over-confluent.  
290 The supernatants of monoclonal hybridomas were sterilized using 0.22  $\mu\text{m}$  pore filters (Corning) and used  
291 directly as antibody solution in other assays.

292 HEK293T cells were cultured in DMEM medium (high-glucose) (nacalai tesque) supplemented with 10%  
293 fetal bovine serum (FBS) (BioWest),  $1 \times$  GlutaMAX (Gibco),  $1 \times$  sodium pyruvate (Merck) and 50  $\mu\text{M}$  2-  
294 mercaptoethanol (Gibco).  $5 \times 10^5$  cells were seeded into 60 mm culture dish without coating, cultured under 5%  
295  $\text{CO}_2$  at 37°C. Cells were subcultured every three days.

296 HeLa cells were cultured in DMEM medium (high-glucose) (nacalai tesque) supplemented with 10% FBS,  
297  $1 \times$  GlutaMAX,  $1 \times$  sodium pyruvate and 50  $\mu\text{M}$  2-mercaptoethanol.  $5 \times 10^5$  cells were seeded into 60 mm culture  
298 dish without coating, cultured under 5%  $\text{CO}_2$  at 37°C. Cells were subcultured every three days.

299 EB3 mESCs were cultured in DMEM medium (high-glucose) (nacalai tesque) supplemented with 10% FBS,  
300  $1 \times$  GlutaMAX,  $1 \times$  sodium pyruvate, 50  $\mu\text{M}$  2-mercaptoethanol, in-house produced mouse leukemia inhibitory  
301 factor (mLIF), 1  $\mu\text{M}$  PD0325901 (FUJIFILM Wako) and 3  $\mu\text{M}$  CHIR99021 (FUJIFILM Wako).  $1 \times 10^5$  of  
302 mESCs were seeded into iMatrix-511 silk (Matrixome) pre-coated 35 mm culture dish, cultured under 5%  $\text{CO}_2$   
303 at 37°C. Cells were subcultured every three days.

#### 304 **Generation of transgenic mESC lines**

305 The doxycycline-controlled mES::TRE-3FLAG-Dux cell line was generated by co-transfecting EB3 mESCs  
306 with pPB-TRE-3FLAG-Dux, pPB-CAG-rtTA3G, and pCMV-HyPBase plasmids as described previously (49).  
307 48 hours post-transfection, the cells were subjected to 500  $\mu\text{g}/\text{mL}$  hygromycin (FUJIFILM Wako) and 500  $\mu\text{g}/\text{mL}$   
308 G418 (FUJIFILM Wako) selection for seven days. The selected cells were then seeded at  $2 \times 10^2$  cells/ $\text{cm}^2$  in  
309 culture medium containing 250  $\mu\text{g}/\text{mL}$  hygromycin and 250  $\mu\text{g}/\text{mL}$  G418. Single-cell clones were picked and  
310 expanded after seven days.

311 The TDP-43  $\Delta\text{N}$  mutant mESC lines were generated by co-transfecting EB3 mESCs with pX330-puro-  
312 Tardbp-gRNA1, pX330-puro-Tardbp-gRNA2, pX330-puro-Tardbp-gRNA3, and pX330-puro-Tardbp-gRNA4  
313 plasmids. After 24 hours, cells were passaged and subjected to 0.75  $\mu\text{g}/\text{mL}$  puromycin (Merck) selection for four  
314 days. The selected cells were then seeded at 50 cells/ $\text{cm}^2$  in culture medium containing 0.75  $\mu\text{g}/\text{mL}$  puromycin.  
315 Single-cell clones were picked and expanded after seven days.

#### 316 **siRNA transfection**

317 mESCs were trypsinized and washed with  $1 \times$  PBS (nacalai tesque) once.  $2 \times 10^5$  cells were transfected  
318 with 40 pmol siRNA and 20  $\mu$ L P3 Primary Cell Nucleofector Solution (Lonza) (Supplement 1 added) using  
319 program CG-104 in 96-well Shuttle Device (Lonza) according to manufacturers' instructions. Transfected cells  
320 were then seeded into iMatrix-511 silk pre-coated culture dish for culture and further experiments.

### 321 **Immunopurification and Western blotting**

322 Objective culture cells were trypsinized and washed with  $1 \times$  PBS once. Appropriate number of cells ( $1 \times$   
323  $10^4$  cells/ $\mu$ L for final lysate concentration) were resuspended with IP buffer (20 mM Tris-HCl pH 7.4, 150 mM  
324 NaCl, 0.1% NP-40), sonicated by Bioruptor II (BM Equipment) with a total of 5 minutes of ON time in HIGH  
325 mode. The lysed cell solution was centrifuged at 17,700 g for 2 minutes at 4°C, supernatant was then collected  
326 as cell lysate for IP. 100  $\mu$ L of antibodies (culture supernatant) was conjugated to 10  $\mu$ L Dynabeads Protein G  
327 (Thermo Fisher Scientific) for 30 minutes at 4°C, followed by washing once in IP buffer. Antibody conjugated  
328 beads were incubated with appropriate amount of cell lysate for two hours at 4°C. Beads were washed three times  
329 in IP buffer and eluted with SDS-loading dye at 95°C for 3 minutes. The eluted interactome was resolved on  
330 SDS-PAGE and transferred onto a nitrocellulose membrane (Amersham Protran, GE Healthcare). The membrane  
331 was rinsed in PBS-T (0.1% Tween-20) three times, blocked in 2% nonfat skim milk and then incubated in diluted  
332 primary antibody for 1 hour at room temperature. After three washes in PBS-T, the membrane was incubated in  
333 1/5000 dilution of the peroxidase-conjugated sheep anti-mouse IgG secondary antibody (MP Biomedicals) for  
334 30 minutes at room temperature. The membrane was washed in PBS-T three times and signal was detected using  
335 ECL Western Blotting Detection Reagents (GE Healthcare).

### 336 **Shotgun mass spectrometric analysis**

337 Co-IP of L1 ORF1p was performed using mES::TRE-3FLAG-Dux lysate (induced with 10 ng/mL  
338 doxycycline for 20 hours) with/without antibodies cross-linked to beads by 0.5% formaldehyde (Sigma-Aldrich).  
339 Immuno-precipitation using non-immunized mouse IgG (Immuno-Biological Laboratories) was also performed  
340 as a negative control. The immunoprecipitants were eluted in elution buffer containing 10 mM Tris-HCl (nacalai  
341 tesque) and 1% SDS (FUJIFILM Wako) by heating for 3 minutes at 95°C. The elutions were precipitated by  
342 TCA/acetone precipitation. After alkylation in iodoacetamide solution for 1 hour at room temperature with  
343 shielding from light, the proteins were concentrated by chloroform/methanol precipitation and then digested using  
344 Trypsin Gold (Promega) at 37°C overnight. An LTQ-Orbitrap Velos mass spectrometer (Thermo Fisher Scientific)  
345 equipped with a nanoLC interface (AMR) was used for peptide separation and identification. The data were

346 compared against the UniProt protein sequence database of *Mus Musculus* using protein identification in the  
347 search program Proteome Discoverer 1.4 (Thermo Fisher Scientific). The p value of the Sum PEP Scores relative  
348 to negative controls was calculated using the Student's t-test, and then the q value was calculated by the  
349 Benjamini-Hochberg procedure. Only proteins detected in all three replicate experiments were used. The fold  
350 change was calculated by dividing the mean value of the Sum PEP Score +1 by the value of the negative control  
351 Sum PEP Score +1. To screen candidates for L1 ORF1p interactors, proteins with a higher than sixteen-fold  
352 change and q value < 0.01 were listed as candidates.

### 353 **L1 retrotransposition assay**

354 L1 retrotransposition assays were performed as described previously with some modifications (26, 27).  
355 cep99-gfp-ORFeus-Mm (EF1 $\alpha$ EF1 $\alpha$ ) was used as the L1 reporter in this study. This reporter plasmid was based  
356 on cep99-gfp-ORFeus-Mm (cep99-gfp-L1SM in (50)) with EF1 $\alpha$  promoters inserted into the upstream 5' UTRs  
357 of the LINE-1 cassette and EGFP cassette for powerful expression in mESCs. To measure retrotransposition  
358 efficiency in HEK293T cells,  $5 \times 10^5$  cells were seeded into 0.001% poly-L-lysine (nacalai tesque) pre-coated 6-  
359 well plates, then cultured at 37°C overnight. The following day (day 2), cells were transfected with total 2  $\mu$   
360 plasmid DNA using 5  $\mu$ L Lipofectamine 2000 transfection reagent (Thermo Fisher Scientific) and 250  $\mu$ L Opti-  
361 MEM (Gibco) according to the manufacturers' instructions. The following day (day 3), transfected cells were  
362 trypsinized and  $1.5 \times 10^5$  cells were passaged into each 60 mm culture dish with 0.001% poly-L-lysine coating  
363 and cultured at 37°C until day 7 without medium change. On day 7, cells were collected and resuspended in  
364 FluoroBrite DMEM (Gibco) supplemented with 10% FBS, and the proportion of EGFP-positive cells was  
365 measured using a flow cytometer (SONY SH800Z). In the established L1 retrotransposition assay, cells are  
366 typically puromycin selected after transfection with the L1 reporter in order to concentrate episomal L1 reporter-  
367 expressing cells. However, in our hands administration of puromycin led to extensive cell death with over-  
368 expression of TDP-43, so we conducted the retrotransposition assay without puromycin selection, which resulted  
369 in 1~2% of EGFP-positive cells consistently in baseline conditions.

370 For mESCs, 100  $\mu$ L of  $2.0 \times 10^5$  cell suspension was mixed with total 1  $\mu$ g plasmid DNA using 2.5  $\mu$ L  
371 Lipofectamine 2000 transfection reagent (Thermo Fisher Scientific) and 50  $\mu$ L Opti-MEM (Gibco) according to  
372 manufacturers' instructions. Cell-DNA mixture was then seeded into iMatrix-511 silk pre-coated 96-well plate,  
373 cultured at 37°C for 6 hours, then replaced with fresh ES medium. The following day (day 2), transfected cells  
374 were trypsinized and  $2.0 \times 10^5$  cells were passaged into iMatrix-511 silk pre-coated 35 mm culture dish with 0.5

375  $\mu\text{g}/\text{mL}$  puromycin (Sigma) ES medium. Cells were cultured at  $37^\circ\text{C}$  until day 5, when the medium was replaced  
376 with  $0.5 \mu\text{g}/\text{mL}$  puromycin ES medium. On day 7, cells were collected and resuspended in FluoroBrite DMEM  
377 (Gibco) supplemented with 10% FBS, and the proportion of EGFP-positive cells was measured by flow  
378 cytometry (SONY SH800Z).

### 379 **Immunofluorescence staining**

380 Cells were seeded on cover glasses (pre-coating cover glasses if need) in corresponding medium and  
381 transfected with plasmid DNAs the following day. Cells were fixed with 4% formaldehyde in PBS-T for 30  
382 minutes at room temperature 48 hours post transfection (hpt). Fixed cells were washed once in PBS-T, and  
383 permeabilized with 0.1% Triton X-100 (Bio-Rad) in PBS-T for 30 minutes at room temperature. Cells were  
384 blocked using 1% bovine serum albumin (BSA) (Sigma-Aldrich) in PBS-T for 30 minutes, then incubated with  
385 diluted antibody for 1 hour at room temperature. After three washes in PBS-T, cells were incubated in 1/1000  
386 diluted Alexa Fluor 488 or 555 conjugated goat anti-mouse IgG secondary antibody (Thermo Fisher Scientific)  
387 and  $1 \mu\text{g}/\text{mL}$  DAPI solution for 30 minutes at room temperature, in the dark. The cover glasses were mounted  
388 with Prolong Glass Antifade Mountant (Thermo Fisher Scientific) overnight at room temperature before  
389 observing. Fluorescence images were taken with Olympus FV3000 confocal laser scanning microscope.

390 For immunofluorescence staining in mouse embryos, embryos were collected post mating from 8-week-old  
391 female B6D2F1 mice injected with  $150 \mu\text{L}$  CARD HyperOva (KYUDO) and 5 IU hCG (ASKA Animal Health).  
392 Embryos were transferred into EmbryoMax Advanced KSOM Embryo Medium (KSOM medium) (Sigma-  
393 Aldrich) supplemented with  $0.3 \mu\text{g}/\mu\text{L}$  hyaluronidase (Sigma-Aldrich), then cultured in KSOM medium at  $37^\circ\text{C}$   
394 until they developed to the desired stages. Developed embryos were treated with EmbryoMax Acidic Tyrode's  
395 solution (Merck) to remove Zona Pellucida (ZP), then fixed in 4% paraformaldehyde (nacalai tesque) in PBS.  
396 Fixed embryos were washed in PBS three times, and permeabilized with 0.1% Triton X-100 in PBS for 20  
397 minutes at room temperature. Embryos were washed three times then blocked in 2% BSA (Sigma-Aldrich) in  
398 PBS for 20 minutes at room temperature. Blocked embryos were incubated with diluted antibody in 2% BSA in  
399 PBS at  $4^\circ\text{C}$  overnight. After three washes in PBS, embryos were transferred into 1/500 diluted Alexa fluor 488  
400 or 555 conjugated goat anti-mouse IgG secondary antibody (Thermo Fisher Scientific) and 1/200 diluted DAPI  
401 solution (nacalai tesque), and incubated for 1 hour at room temperature in the dark. Embryos were washed with  
402 PBS three times, then transferred to a clean PBS drop in a 35 mm dish with glass bottom (Matsunami Glass),  
403 covered with paraffin liquid (nacalai tesque). Fluorescence images were taken with Olympus FV3000 confocal

404 laser scanning microscope. The animal experiments were approved by the Animal Care and Use Committee of  
405 Keio University and were conducted in compliance with Keio University Code of Research Ethics.

#### 406 **RNA isolation and cDNA synthesis**

407 Total RNA was isolated using ISOGEN (NIPPON GENE) according to manufacturers' instructions. Total  
408 RNA was stored at -80°C. cDNAs were prepared using Transcriptor First Strand cDNA Synthesis Kit (Roche)  
409 according to manufacturers' instructions and the synthesized cDNAs were stored at -20°C.

#### 410 **Whole-genome-amplification**

411 Mouse embryos were collected post mating from 8-week-old female B6D2F1 mice injected with 150  $\mu$ L  
412 CARD HyperOva (KYUDO) and 5 IU hCG (ASKA Animal Health). Embryos were transferred into EmbryoMax  
413 Advanced KSOM Embryo Medium (KSOM medium) (Sigma-Aldrich) supplemented with 0.3  $\mu$ g/ $\mu$ L  
414 hyaluronidase (Sigma-Aldrich), then cultured in KSOM medium at 37°C. Microinjection was performed at  
415 0.5dpc under a phase-contrast inverted microscope (IX73, Olympus) equipped with a micromanipulation system  
416 (Narishige). Each siRNA (20  $\mu$ M) was microinjected into the male pronuclei of zygotes using FemtoJet 4i  
417 (Eppendorf). Injected embryos were cultured in KSOM until they developed to blastocysts (4.5 dpc), which were  
418 then treated with EmbryoMax Acidic Tyrode's solution (Merck) to remove ZP. Five siScramble-injected or five  
419 siTardbp-injected blastocysts were collected and genomic DNA was amplified using REPLI-g Single Cell Kit  
420 (QIAGEN) according to manufacturers' instructions. Three biological replicates were generated for each sample.  
421 Amplified genomic DNA was used as template for qPCR and TIP-seq to detect *de novo* L1 insertions. The animal  
422 experiments were approved by the Animal Care and Use Committee of Keio University and were conducted in  
423 compliance with Keio University Code of Research Ethics.

#### 424 **Genomic DNA preparation and qPCR**

425 Genomic DNA isolation was started with  $1.0 \times 10^6$  cells. Freshly harvested cells were washed with PBS  
426 once then suspended in 500  $\mu$ L protease K buffer (1  $\times$  SSC, 20 mM Tris-HCl pH 7.9, 1 mM EDTA, 1% SDS).  
427 Cell pellets were disrupted by syringe to lyse cells completely. 10  $\mu$ L 20 mg/mL protease K (FUJIFILM Wako)  
428 was added to the lysed cell solution and incubated at 55°C for at least 2 hours. 1  $\mu$ L 10 mg/mL RNase A (nacalai  
429 tesque) was added to the solution and incubated for an hour at 37°C. Genomic DNA was extracted twice by  
430 adding an equal volume of phenol/chloroform/isoamyl alcohol (25:24:1) (NIPPON GENE), then adding an equal  
431 volume of isopropanol (FUJIFILM Wako) to precipitate genomic DNA. Centrifugation at 17,700 g for 12 minutes  
432 at 4°C was followed by removal of the supernatant and washing of the DNA pellet with ice-cold 70% ethanol

433 (FUJIFILM Wako). DNA was left at room temperature for 5 minutes to allow the remaining water to evaporate  
434 and 100  $\mu$ L TE (10 mM Tris, 1 mM EDTA) was added to dissolve genomic DNA. 1  $\mu$ L 1 mg/mL RNaseA  
435 (nacalai tesque) was added to the genomic DNA solution and incubated at 37°C for at least 3 hours. The solution  
436 volume was adjusted to 500  $\mu$ L with protease K buffer and 3  $\mu$ L 20 mg/mL protease K, and incubated at 55°C  
437 for an hour. Phenol/chloroform/isoamyl alcohol extraction was repeated twice, adding isopropanol to precipitate  
438 genomic DNA and centrifuging as above, followed by washing the DNA pellet with ice-cold 70% ethanol once.  
439 Genomic DNA was left to air dry at room temperature no longer than 10 minutes, and then dissolved in 100  $\mu$ L  
440 TE. DNA and RNA concentrations were measured using a Qubit Fluorometer (Invitrogen), and DNA was kept  
441 at 4°C for short term or -20°C for long term storage.

442 qPCR was performed using TB Green Fast qPCR Mix (TaKaRa) on Thermal Cycler Dice Real Time System  
443 (TaKaRa) according to manufacturers' instructions. The primer sets used are shown in **Supplemental Table 2**.  
444 Amplification efficiency of qPCR was calculated on the basis of the slope of the standard curve. After confirming  
445 amplification efficiency values, relative quantities of DNA were used in further calculations.

#### 446 **Targeted enrichment sequencing of L1 insert junctions**

447 TIP-seq was performed as described previously (31). Briefly, 10  $\mu$ g of mouse genomic DNA was digested  
448 by six restriction enzymes (AseI, BspHI, HindIII, NcoI, PstI and PstI) separately, then ligated with vectorette  
449 adaptors. Vectorette PCR was performed with an L1 sequence specific primer combined with adaptor specific  
450 primers (shown in **Supplemental Table 2**). The PCR products were sheared by sonicating using Covaris S2  
451 (M&S Instruments) with 4 intensity, 10% duty cycle, and 200 cycle per burst for 100 seconds per sample. The  
452 sheared DNA fragments were purified by column then used for next generation sequencing (NGS) library  
453 construction using NEBNext Ultra II DNA Library Prep Kit for Illumina according to manufacturers' instructions.  
454 The libraries were quantified with 2100 Bioanalyzer (Agilent) using Agilent High Sensitivity DNA Kit and Kapa  
455 Library Quantification Kit (NIPPON Genetics). Quantified libraries were pooled accordingly and deep  
456 sequencing was performed using MiSeq sequencer (Illumina, paired-end, 150 bp) and HiSeq X sequencer  
457 (Illumina, paired-end, 150bp).

458 Bioinformatic analysis was performed as described in the pipeline of RC-seq (26). Briefly, L1 primer  
459 sequence was trimmed from raw sequencing reads. The trimmed reads were quality controlled using fastp (51)  
460 v0.23.2. Quality controlled reads were processed by FLASH (52) v2.2.00 with default arguments to merge  
461 overlapping reads. Merged reads were aligned to GRCm38.p6, C57BL/6NJ, and DBA/2J reference genome using



462 Bowtie2 (53) v2.4.1 with default arguments. Reads mapped to at least one reference genome and annotated L1  
463 loci were deemed germline-origin. Germline-origin reads were excluded from downstream analysis. Unmapped  
464 reads were extracted and aligned to active L1 consensus sequence using LAST (54) v1256 (-s 2 -l 12 -d 30 -q 3  
465 -e 30). Reads aligned  $\geq 53$  nt and  $> 95\%$  identical to L1 consensus sequence were retained and aligned to L1  
466 hard-masked GRCm38.p6 reference genome using Bowtie2 v2.4.1 --very-sensitive-local mode. Genomic  
467 locations mapped by more than three reads and absent from control libraries or previously annotated L1 loci were  
468 deemed somatic insertions.

### 469 **Single-cell RNA-seq analysis**

470 Raw single-cell RNA-seq data was obtained from the dataset of Deng *et al*, (GSE45719). Raw sequencing  
471 reads were quality controlled using fastp v0.23.2. Quality-controlled reads were first merged by embryonic stages  
472 and aligned to reference sequence of known mouse TEs using STAR v2.7.9a with default arguments, RPKM  
473 normalized read coverage of active L1 subfamilies were calculated using deepTools (55) v3.5.1 bamCoverage  
474 function (**fig. S3B**). Quality-controlled reads were then aligned to reference sequence of known mouse TEs using  
475 STAR (56) v2.7.9a with default arguments. Reads were counted against GRCm38.p6 comprehensive gene  
476 annotation (57) and mm10 repeats from the University of California, Santa Cruz (UCSC) RepeatMasker  
477 annotation using Subread (58) v2.0.1 featureCounts function. Multi-mapping reads were discarded for non-TE  
478 features and counted fractionally for TEs. Counts on TE loci that belong to same subfamily were combined for  
479 downstream analysis. Seurat (59) v4.1.0 was used to process the read counts of single-cell RNA-seq. Cells with  
480 greater than 7.5% mitochondrial reads or less than 14,000 annotated features were discarded. Expression levels  
481 were log-normalized.

### 482 **RNA-seq**

483 Preparation of total RNA-seq library was performed using SMART-Seq Stranded Kit (Clontech), according  
484 to manufacturers' instruction. In brief, 19 of siScramble injected or 23 of siTardbp injected ZP-free embryos  
485 were lysed in  $1 \times$  Lysis Buffer containing RNase inhibitor (0.2 IU/ $\mu$ l, from SMART-Seq Stranded Kit, Clontech),  
486 directly. RNAs were sheared by heating at 85°C for 8 minutes and used for reverse transcription with random  
487 hexamers and PCR amplification. Ribosomal fragments were depleted from each cDNA sample with scZapR  
488 and scR-Probes. Indexed total RNA-seq libraries were enriched by second PCR amplification then sequenced  
489 using HiSeq X sequencer (Illumina, paired-end, 150 bp). Three biological replicates were generated for each  
490 sample. Raw sequencing reads were quality controlled using fastp v0.23.2. Quality-controlled reads were first

491 aligned to reference sequence of known mouse TEs using STAR v2.7.9a with default arguments, RPKM  
492 normalized read coverage of active L1 subfamilies were calculated using deepTools v3.5.1 bamCoverage  
493 function (**fig. S3H**). Quality-controlled reads were then aligned to the GRCm38.p6 reference genome using  
494 STAR, with default arguments. Reads were counted against GRCm38.p6 comprehensive gene annotation and  
495 mm10 repeats from the University of California, Santa Cruz (UCSC) RepeatMasker annotation using Subread  
496 v2.0.1 featureCounts function. Multi-mapping reads were discarded for non-TE features and counted fractionally  
497 for TEs. Counts on TE loci that belong to same subfamily were combined for differential expression analysis  
498 performed by DESeq2 (60) v1.32.0.

499

## 500 **Acknowledgements**

501 We thank all members of the Siomi laboratory at Keio University, for discussions and comments on this  
502 work. We also thank Dr. Tomoichiro Miyoshi (Kyoto University), Dr. Jose Luis Garcia-Perez (The University  
503 of Edinburgh), and Dr. John V. Moran (University of Michigan) for the generous gift of L1 reporter plasmids for  
504 retrotransposition assay. We are grateful to Dr. Tomoichiro Miyoshi (Kyoto University), Abdul Fatah Ahmad  
505 Luqman (Kyoto University), and Hitoshi Otani (Nagoya University) for critical comments on the manuscript.  
506 This work was supported by the MEXT Grant-in-Aid for Scientific Research in Innovative Areas (19H05753 to  
507 H.S.), the AMED project for elucidating and controlling mechanisms of aging and longevity (1005442 to H.S.),  
508 JSPS Grant-in-Aid for Scientific Research KAKENHI (20K21507, 20H03439 to K.M.), Mochida Memorial  
509 Foundation Research Grant to K.M., Sumitomo Foundation Research Grant to K.M., and Keio University  
510 Doctorate Student Grant-in-Aid Program to T.D.L..

511

## 512 **Author Contributions**

513 H.S., K.M. and T.D.L. conceived and designed the project; T.D.L., K.M., T.K., Y.G., L.N. performed the  
514 biochemical experiments and bioinformatic analyses; H.S. and K.M. supervised and coordinated experiments;  
515 T.D.L., K.M. and H.S. wrote the paper with input from all authors. All authors reviewed the manuscript and  
516 approved its final version.

517

## 518 **Declaration of Interests**

519 The authors declare no competing interests.

520

## 521 **Data and Code Availability**

522 The TIP-seq data generated in this study have been deposited at NCBI Sequence Read Archive (SRA)  
523 database under the accession code PRJNA818428. The RNA-seq data generated in this study have been deposited  
524 at NCBI Gene Expression Omnibus (GEO) database under the accession code GSE199197.

525

## 526 **Figure legends**

### 527 **Figure 1. Characterization of L1 ORF1p in mESCs and mouse preimplantation embryos**

528 **A.** IP of endogenous L1 ORF1p in wild type mESCs followed by WB. n.i, non-immunized mouse (IgG  
529 control); Ab, antibody only. **B.** Immunofluorescence of wild type mESCs shows colocalization of endogenous  
530 L1 ORF1p and MERVL Gag in 2C-like cells. Images are maximal Z projections of confocal sections. **C.**  
531 Immunofluorescence of mouse embryos at late 2 cell (2C) stage and 4 cell (4C) stage. L1 ORF1p localized on  
532 the surface of the embryo with evenly scattered foci. Also see **fig. S1B**. Images are maximal Z projections of  
533 confocal sections. DIC, differential interference contrast microscope. **D.** (Upper panel) Scheme of mES::TRE-  
534 3FLAG-Dux cell line construct. 3FLAG-Dux is inserted after the TRE promoter, which drives downstream gene  
535 expression upon induction by doxycycline. (Lower panel) MERVL Gag and L1 ORF1p are up-regulated in  
536 mES::TRE-3FLAG-Dux cell line in a doxycycline dose-dependent manner. **E.** Immunofluorescence of  
537 mES::TRE-3FLAG-Dux cells. Images are maximal Z projections of confocal sections. Proportion of cells  
538 expressing L1 ORF1p and MERVL Gag were increased in a doxycycline dose-dependent manner.

### 539 **Figure 2. TDP-43 interacts with L1 ORF1p and inhibits L1 retrotransposition**

540 **A.** Silver staining of L1 ORF1p interacting proteins co-IPed from mES::TRE-3FLAG-Dux cells after  
541 doxycycline induction. Ab, antibody only; n.i, non-immunized mouse IgG (IgG control). **B.** Volcano plot  
542 showing interactome of L1 ORF1p identified by LC-MS/MS. Horizontal axis: log<sub>2</sub> fold change of protein signal  
543 enrichment in anti-L1 ORF1p co-IP product versus non-immunized IgG co-IP product; vertical axis: -log<sub>10</sub> false  
544 discovery rate (FDR). Blue dots represent highly enriched proteins in the L1 ORF1p interactome. Proteins that  
545 were selected for further screening are labeled. **C.** Scheme of the retrotransposition assay. The bivalent reporter  
546 plasmid (cep99-gfp-ORFeus-Mm (EF1 $\alpha$ EF1 $\alpha$ ), see **Materials and Methods**) encodes a transposition-competent  
547 L1 followed by an anti-sense EGFP cassette interrupted by an intron. Once transcribed, the intron is spliced and  
548 the mature mRNA containing an uninterrupted anti-sense EGFP cassette can be inserted into the host genome,

549 leading to EGFP-positive cells. TSD, target site duplication. **D.** Effects of L1 ORF1p interactors on L1  
550 retrotransposition was examined by fluorescence-activated cell sorting (FACS) of HEK293T cells subjected to  
551 retrotransposition assay with ectopic expression of candidate proteins in **B.** Over-expression of TDP-43 markedly  
552 repressed L1 retrotransposition. Negative control representing cells transfected with empty vector. **E.** IP of L1  
553 ORF1p followed by WB using mES::TRE-3FLAG-Dux lysate. Interaction of endogenous L1 ORF1p and TDP-  
554 43 was confirmed.

### 555 **Figure 3. Zygotic TDP-43 KD leads to increased L1 retrotransposition**

556 **A.** Immunofluorescence of zygotes injected with control (siScramble) or TDP-43 (siTardbp) targeting  
557 siRNA. TDP-43 KD morulae show strongly decreased TDP-43 signal. Images are maximal Z projections of  
558 confocal sections. **B.** Expression level of *Tardbp* as assessed by RNAseq with and without KD. **C.** qPCR using  
559 primer sets targeting active L1 subfamilies (29) with WGA DNA from five blastocysts (4.5 dpc) +/- TDP-43 KD  
560 as template. Expression of active L1 subfamilies was increased in TDP-43 KD embryos. \*\*, p value  $\leq 0.01$ ; \*\*\*,  
561 p value  $\leq 0.001$ . **D.** MA plot showing expression change of TEs in TDP-43 KD embryos. Horizontal axis: log<sub>10</sub>  
562 normalized read count (baseMean); vertical axis: log<sub>2</sub> fold change of expression level in KD embryos versus  
563 control embryos. L1 elements are highlighted in red. Here we adopted L1 classification of repeat masker in RNA-  
564 seq analysis, so L1Md\_A corresponds to subfamily L1MdA\_I, L1Md\_AII and L1Md\_AIII; L1Md\_T  
565 corresponds to subfamily T<sub>F</sub> and G<sub>F</sub>; L1Md\_F2 corresponds to L1Md\_AIV, L1Md\_AVII and L1Md\_F;  
566 L1Md\_F3 corresponds to the remaining A subfamily and partial of subfamily L1Md\_N\_I (30). **E.** Targeted  
567 enrichment sequencing was used to detect previously un-annotated putative L1 insertion sites in TDP-43 KD  
568 embryos (4.5 dpc) and in control embryos (4.5 dpc).

### 569 **Figure 4. TDP-43 mutation in mESCs results in increased L1 retrotransposition**

570 **A.** mESCs treated with control and *Tardbp*-targeting siRNA were used for the retrotransposition assay (see  
571 **Fig. 2C**) and analyzed by FACS. The experimental time course is shown above. Retrotransposition frequency  
572 was increased in cells transfected with siTardbp compared with siScramble. **B.** Strategy to knock out TDP-43  
573 using CRISPR/Cas9 with four gRNAs is illustrated in the upper panel. The resulting clones are annotated as  
574 TDP-43  $\Delta$ N cell lines (#3, #11, #14). These three mono-cloned lines were isolated and N terminal truncated TDP-  
575 43 was detected by WB using anti-TDP-43 C terminal antibody. See also **fig. S4, C** and **D.** **C.** qPCR using primer  
576 sets targeting each active L1 subfamily (29) was performed on wild type and  $\Delta$ N lines. The expression of active  
577 L1 subfamilies was increased in TDP-43  $\Delta$ N mESCs. \*, p value  $\leq 0.05$ ; \*\*, p value  $\leq 0.01$ .

578 **Figure 5. Interaction with L1 ORF1p is required for TDP-43-mediated L1 retrotransposition**

579 **A.** Illustration of TDP-43 mutants used in this study. **B.** The FACS-based retrotransposition assay (see **Fig.**  
580 **2C**) showed that retrotransposition frequency was higher in HEK293T cells with ectopic expression of the TDP-  
581 43  $\Delta$ N mutant compared to the full-length TDP-43. The experimental time course is shown in the upper panel.  
582 **C.** The interaction between the FLAG-tagged TDP-43  $\Delta$ N mutant and L1 ORF1p was examined by co-IP of L1  
583 ORF1p in HEK293T cells. The interaction between TDP-43  $\Delta$ N mutant and L1 ORF1p was compromised  
584 relative to wild type TDP-43. **D.** The interaction between FLAG-tagged TDP-43 mutants (**A**) and L1 ORF1p was  
585 examined by co-IP of L1 ORF1p in HEK293T cells. Loss of either the C terminal domain or mutation of the NLS  
586 did not affect TDP-43's interaction with L1 ORF1p. **E.** L1 retrotransposition frequency in HEK293T cells over-  
587 expressing TDP-43 mutants. Experimental time course is shown above. Inhibition of retrotransposition by TDP-  
588 43 was compromised by loss of the C terminal domain but not other mutations. **F.** Subcellular localization of L1  
589 ORF1p and TDP-43 mutants in HeLa cells by immunofluorescence staining. The TDP-43 NLS mutant was  
590 localized to the cytoplasm, with significant overlap with L1 ORF1p. **G.** Summary table of the characteristics of  
591 TDP-43 mutants.

592

593 **Supplemental figure 1. Anti-L1 ORF1p antibody produced in this study**

594 **A.** The anti-L1 ORF1p antibody produced in this study specifically recognize L1 ORF1p in wild type  
595 mESCs. **B.** Microscopic image of cross section of late-2C embryo from **Fig. 1C**. **C.** Immunofluorescence of  
596 mouse embryos at late-2C stage using commercial anti-L1 ORF1p antibody (rabbit polyclonal antibody, abcam)  
597 showing identical localization pattern of L1 ORF1p.

598 **Supplemental figure 2. Verification of retrotransposition assay and candidate proteins' expression**

599 **A.** (Upper panel) Fluorescence microscopy of HEK293T cells +/- tenofovir treatment using the  
600 retrotransposition assay in **Fig. 2C**. L1 retrotransposition frequency (as measured by EGFP-positive cells) was  
601 decreased by tenofovir treatment as expected. (Lower panel) FACS plots summarizing total data from this  
602 experiment. **B.** L1 retrotransposition frequency was decreased by tenofovir in a dose-dependent manner. **C.**  
603 Expression of selected interacting proteins (from **Fig. 2B**) in HEK293T cells. Expression of Gag protein was  
604 confirmed by IF of C terminal-fused mCherry. Expression of the other factors was confirmed by WB using an  
605 antibody against C terminal-fused FLAG tags. **D.** FACS plots from retrotransposition assays using the nine  
606 selected factors, corresponding to **Fig. 2D**. **E.** Splicing efficiency of L1 reporter was measured to be 24, 48, and

607 72hpt by RT-PCR in TDP-43 over-expression cells and negative control cells. Primers were designed to flank  
608 the EGFP cassette intron. L1 reporter plasmid was used as an un-spliced control (upper band) and 28S rDNA  
609 was used as an internal control for PCR. **F.** Expression of L1 reporter (left three lanes) and co-expression of L1  
610 reporter and TDP-43 (right three lanes) were measured by WB. TDP-43 did not affect L1 reporter expression.

### 611 **Supplemental figure 3. Zygotic TDP-43 KD leads to developmental defect**

612 **A.** Expression profile of *Tardbp* and L1 during mouse preimplantation embryogenesis, based on data from  
613 (28). **B.** Single-cell RNA-seq coverage plot of active L1 subfamilies. Single-cell RNA-seq reads were mapped  
614 to reference sequences of all transposable elements. Mapping results of same cell stage were merged and RPKM  
615 normalized. **C.** Immunofluorescence of mouse embryos at late-2C and 4C stage. **D.** Images of control embryos  
616 and TDP-43 KD embryos at 1.5 dpc (2C) and 4.5 dpc (blastocyst). **E.** Development progress at 4.5 dpc of TDP-  
617 43 KD embryos was comparable with that of control embryos. **F.** Diameter (left panel) and volume (right panel)  
618 of siTardbp and siScramble injected embryos. TDP-43 KD embryos are significantly smaller than control  
619 embryos. **G.** Phylogenetic tree of mouse L1 families. The A subfamily, G<sub>F</sub> subfamily and T<sub>F</sub> subfamily are  
620 considered to be retrotransposition-active, whereas ancestral L1 subfamilies (L<sub>x</sub>, V and F) are inactive “fossils”  
621 (modified from (30)). **H.** RNA-seq coverage plot of active L1 subfamilies. RNA-seq reads were mapped to  
622 reference sequences of all transposable elements. Mapping results of same experiment condition were merged  
623 and RPKM normalized. **I.** qPCR was performed to quantify the amount of *β-actin* gene in WGA product. No  
624 amplification bias was observed in any of the six samples. **J.** Scheme of targeted enrichment sequencing for L1  
625 insert junctions (modified from (31)). Briefly, restriction enzyme (gray triangles) digested genomic DNA was  
626 ligated with imperfect base paired (illustrated in red and yellow) vectorette adapters, and L1 containing fragments  
627 were amplified by specific primer sets against L1 3' UTR and vectorette sequences. The PCR amplicons were  
628 sheared by sonication, followed by Illumina sequencing library preparation. Paired-end sequencing reads were  
629 processed and mapped to the reference genome (26, 51-53). Amplified sequences are illustrated in gray and L1-  
630 genome junctions are noted by the red arrowhead. **K.** (Upper panel) Genomic track view of targeted enrichment  
631 sequencing-detected putative L1 insertion loci in TDP-43 KD embryos. Representative raw read data are  
632 presented in the lower panel. The A-rich chromosomal regions may provide “hot” spots for L1 retrotransposition.

### 633 **Supplemental figure 4. Features of TDP-43 ΔN cell lines**

634 **A.** TDP-43 KD by siTardbp persists up to 72 hpt in mESCs. **B.** Splicing efficiency of L1 reporter was measured  
635 to be 24, 48, and 72hpt by RT-PCR in TDP-43 over-expression cells and negative control cells. Primers were

636 designed to flank the EGFP cassette intron. L1 reporter plasmid was used as an un-spliced control (upper band)  
637 and 28S rDNA was used as an internal control for PCR. **C.** Proliferation rates of TDP-43  $\Delta$ N mutant cell lines  
638 were slower than that of wild type mESCs. **D.** (Upper panel) Genotyping result for mouse ES cells. Following  
639 Sanger sequencing data of 1.2 and 0.7 kbp amplicons derived from clone #11 showed that the clone lacks exon  
640 2 of *Tardbp* gene. Clone #14 also lacks exon 2 of *Tardbp* gene on at least one allele. Since the deletion profile of  
641 *Tardbp* gene is not consistent among mESC clones, mRNA typing was carried out followed by Sanger  
642 sequencing (middle panel). cDNA sequencing data of clones #3, #11, and #14 are precisely the same, as shown.  
643 Exon 2 of *Tardbp* gene was deleted by CRISPR/Cas9 editing, resulting in a  $\Delta$ N ( $\Delta$ 1-84 amino acids) mutant.  
644 (Lower panel) Amino acid sequence of mouse TDP-43 bipartite NLS domain (81-87 amino acids and 94-100  
645 amino acids) is shown in red with underline. The alternative start codon is marked in navy blue. **E.** The coding  
646 sequence of the TDP-43  $\Delta$ N mutant was cloned and expressed in wild type mESCs. Bands representing truncated  
647 TDP-43 were observed by WB in all mutant lines. **F.** Subcellular localization of L1 ORF1p and TDP-43 in wild  
648 type mESCs and  $\Delta$ N mutant cell line #3 by immunofluorescence staining. TDP-43 was stained with an antibody  
649 against TDP-43 C terminal domain. **G.** WB for L1 ORF1p shows that its expression level was increased in TDP-  
650 43  $\Delta$ N mutant mESCs.

#### 651 **Supplemental figure 5. FACS plots of retrotransposition assay with TDP-43 mutants**

652 **A.** FACS plots for experiments summarized in **Fig. 5B**. **B.** Co-IP of L1 ORF1p and TDP-43 followed by  
653 RNaseA treatment. HEK293T cells were co-transfected with plasmids encode L1 ORF1p and FLAG-tagged  
654 TDP-43, and IP of L1 ORF1p was performed. The co-IP interaction with TDP-43 was not reduced by RNaseA  
655 treatment. **C.** FACS plots for experiments summarized in **Fig. 5E**.

656

#### 657 **References**

- 658 1. A. K. Tarkowski, Experiments on the development of isolated blastomeres  
659 of mouse eggs. *Nature* **184**, 1286–1287 (1959).
- 660 2. V. E. Papaioannou, J. Mkandawire, J. D. Biggers, Development and  
661 phenotypic variability of genetically identical half mouse embryos.  
662 *Development* **106**, 817–827 (1989).
- 663 3. A. E. Peaston *et al.*, Retrotransposons regulate host genes in mouse oocytes  
664 and preimplantation embryos. *Developmental cell* **7**, 597–606 (2004).
- 665 4. M. A. Eckersley-Maslin, C. Alda-Catalinas, W. Reik, Dynamics of the  
666 epigenetic landscape during the maternal-to-zygotic transition. *Nature*  
667 *Reviews Molecular Cell Biology* **19**, 436–450 (2018).

- 668 5. J. W. Jachowicz *et al.*, LINE-1 activation after fertilization regulates  
669 global chromatin accessibility in the early mouse embryo. *Nature genetics*  
670 **49**, 1502–1510 (2017).
- 671 6. J. L. Garcia-Perez, T. J. Widmann, I. R. Adams, The impact of transposable  
672 elements on mammalian development. *Development* **143**, 4101–4114 (2016).
- 673 7. B. T. Lee *et al.*, The UCSC Genome Browser database: 2022 update. *Nucleic*  
674 *acids research* **50**, D1115–D1122 (2022).
- 675 8. R. J. DeBerardinis, J. L. Goodier, E. M. Ostertag, H. H. Kazazian, Rapid  
676 amplification of a retrotransposon subfamily is evolving the mouse genome.  
677 *Nature genetics* **20**, 288–290 (1998).
- 678 9. J. L. Goodier, E. M. Ostertag, K. Du, H. H. Kazazian, A novel active L1  
679 retrotransposon subfamily in the mouse. *Genome research* **11**, 1677–1685  
680 (2001).
- 681 10. T. P. Naas *et al.*, An actively retrotransposing, novel subfamily of mouse  
682 L1 elements. *The EMBO journal* **17**, 590–597 (1998).
- 683 11. J. V. Moran, N. Gilbert, in *Mobile DNA II*. (American Society of  
684 Microbiology, 2002), pp. 836–869.
- 685 12. B. Brouha *et al.*, Hot L1s account for the bulk of retrotransposition in  
686 the human population. *Proceedings of the National Academy of Sciences* **100**,  
687 5280–5285 (2003).
- 688 13. S. L. Martin, F. D. Bushman, Nucleic acid chaperone activity of the ORF1  
689 protein from the mouse LINE-1 retrotransposon. *Molecular and cellular*  
690 *biology* **21**, 467–475 (2001).
- 691 14. S. L. Martin, The ORF1 protein encoded by LINE-1: structure and function  
692 during L1 retrotransposition. *Journal of Biomedicine and Biotechnology*  
693 **2006**, (2006).
- 694 15. S. L. Mathias, A. F. Scott, H. H. Kazazian, J. D. Boeke, A. Gabriel,  
695 Reverse transcriptase encoded by a human transposable element. *Science*  
696 **254**, 1808–1810 (1991).
- 697 16. A. J. Doucet *et al.*, Characterization of LINE-1 ribonucleoprotein  
698 particles. *PLoS genetics* **6**, e1001150 (2010).
- 699 17. D. C. Hancks, H. H. Kazazian, Roles for retrotransposon insertions in  
700 human disease. *Mobile DNA* **7**, 1–28 (2016).
- 701 18. A. Burton, M.-E. Torres-Padilla, Chromatin dynamics in the regulation of  
702 cell fate allocation during early embryogenesis. *Nature reviews Molecular*  
703 *cell biology* **15**, 723–735 (2014).
- 704 19. S. Ou, F. Wu, D. Harrich, L. F. García-Martínez, R. B. Gaynor, Cloning  
705 and characterization of a novel cellular protein, TDP-43, that binds to  
706 human immunodeficiency virus type 1 TAR DNA sequence motifs. *Journal of*  
707 *virology* **69**, 3584–3596 (1995).
- 708 20. M. Sendtner, TDP-43: multiple targets, multiple disease mechanisms? *Nature*  
709 *neuroscience* **14**, 403–405 (2011).
- 710 21. A. Ratti, E. Buratti, Physiological functions and pathobiology of TDP - 43  
711 and FUS/TLS proteins. *Journal of neurochemistry* **138**, 95–111 (2016).



- 712 22. G. C. Pereira *et al.*, Properties of LINE-1 proteins and repeat element  
713 expression in the context of amyotrophic lateral sclerosis. *Mobile Dna* **9**,  
714 1–30 (2018).
- 715 23. L. Krug *et al.*, Retrotransposon activation contributes to  
716 neurodegeneration in a Drosophila TDP-43 model of ALS. *PLoS genetics* **13**,  
717 e1006635 (2017).
- 718 24. T. S. Macfarlan *et al.*, Embryonic stem cell potency fluctuates with  
719 endogenous retrovirus activity. *Nature* **487**, 57–63 (2012).
- 720 25. A. De Iaco *et al.*, DUX-family transcription factors regulate zygotic  
721 genome activation in placental mammals. *Nature genetics* **49**, 941–945 (2017).
- 722 26. J. L. Garcia-Pérez, Garcia-Pérez, *Transposons and Retrotransposons*.  
723 (Springer, 2016).
- 724 27. J. V. Moran *et al.*, High frequency retrotransposition in cultured  
725 mammalian cells. *Cell* **87**, 917–927 (1996).
- 726 28. Q. Deng, D. Ramsköld, B. Reinius, R. Sandberg, Single-cell RNA-seq reveals  
727 dynamic, random monoallelic gene expression in mammalian cells. *Science*  
728 **343**, 193–196 (2014).
- 729 29. R. Kuroki *et al.*, Establishment of Quantitative PCR Assays for Active Long  
730 Interspersed Nuclear Element-1 Subfamilies in Mice and Applications to  
731 the Analysis of Aging-Associated Retrotransposition. *Frontiers in Genetics*,  
732 1089 (2020).
- 733 30. A. Sookdeo, C. M. Hepp, M. A. McClure, S. Boissinot, Revisiting the  
734 evolution of mouse LINE-1 in the genomic era. *Mobile DNA* **4**, 1–15 (2013).
- 735 31. J. P. Steranka *et al.*, Transposon insertion profiling by sequencing  
736 (TIPseq) for mapping LINE-1 insertions in the human genome. *Mobile DNA* **10**,  
737 1–14 (2019).
- 738 32. H. Kano *et al.*, L1 retrotransposition occurs mainly in embryogenesis and  
739 creates somatic mosaicism. *Genes & development* **23**, 1303–1312 (2009).
- 740 33. C. F. Sephton *et al.*, TDP-43 is a developmentally regulated protein  
741 essential for early embryonic development. *Journal of Biological Chemistry*  
742 **285**, 6826–6834 (2010).
- 743 34. S. G. Doll *et al.*, Recognition of the TDP-43 nuclear localization signal  
744 by importin  $\alpha$  1/ $\beta$ . *Cell Reports* **39**, 111007 (2022).
- 745 35. E. Buratti, F. E. Baralle, Characterization and Functional Implications  
746 of the RNA Binding Properties of Nuclear Factor TDP-43, a Novel Splicing  
747 Regulator of CFTR Exon 9. *Journal of Biological Chemistry* **276**, 36337–36343  
748 (2001).
- 749 36. I. R. Mackenzie, R. Rademakers, M. Neumann, TDP-43 and FUS in amyotrophic  
750 lateral sclerosis and frontotemporal dementia. *The Lancet Neurology* **9**,  
751 995–1007 (2010).
- 752 37. S. A. Smallwood, G. Kelsey, De novo DNA methylation: a germ cell  
753 perspective. *Trends in Genetics* **28**, 33–42 (2012).
- 754 38. I. Cantone, A. G. Fisher, Epigenetic programming and reprogramming during  
755 development. *Nature structural & molecular biology* **20**, 282–289 (2013).

- 756 39. T. S. Mikkelsen *et al.*, Genome-wide maps of chromatin state in pluripotent  
757 and lineage-committed cells. *Nature* **448**, 553–560 (2007).
- 758 40. V. N. Kim, J. Han, M. C. Siomi, Biogenesis of small RNAs in animals.  
759 *Nature reviews Molecular cell biology* **10**, 126–139 (2009).
- 760 41. E. B. Chuong, N. C. Elde, C. Feschotte, Regulatory activities of  
761 transposable elements: from conflicts to benefits. *Nature Reviews Genetics*  
762 **18**, 71–86 (2017).
- 763 42. A. Decout, J. D. Katz, S. Venkatraman, A. Ablasser, The cGAS - STING pathway  
764 as a therapeutic target in inflammatory diseases. *Nature Reviews*  
765 *Immunology* **21**, 548–569 (2021).
- 766 43. M. De Cecco *et al.*, L1 drives IFN in senescent cells and promotes age-  
767 associated inflammation. *Nature* **566**, 73–78 (2019).
- 768 44. P. Li *et al.*, Aicardi - Goutières syndrome protein TREX1 suppresses L1 and  
769 maintains genome integrity through exonuclease-independent ORF1p  
770 depletion. *Nucleic acids research* **45**, 4619–4631 (2017).
- 771 45. T. Geuens, D. Bouhy, V. Timmerman, The hnRNP family: insights into their  
772 role in health and disease. *Human genetics* **135**, 851–867 (2016).
- 773 46. E. Y. Liu *et al.*, Loss of nuclear TDP-43 is associated with decondensation  
774 of LINE retrotransposons. *Cell reports* **27**, 1409–1421. e1406 (2019).
- 775 47. R. Douville, J. Liu, J. Rothstein, A. Nath, Identification of active loci  
776 of a human endogenous retrovirus in neurons of patients with amyotrophic  
777 lateral sclerosis. *Annals of neurology* **69**, 141–151 (2011).
- 778 48. M. Prudencio *et al.*, Repetitive element transcripts are elevated in the  
779 brain of C9orf72 ALS/FTLD patients. *Human molecular genetics* **26**, 3421–  
780 3431 (2017).
- 781 49. C. Takeuchi, Murano, K., Ishikawa, M., Okano, H. and Iwasaki, W.Y.,  
782 Generation of stable Drosophila ovarian somatic cell lines using piggyBac  
783 system. *Methods Mol Biol.*, (2022).
- 784 50. J. L. Garcia-Perez *et al.*, Epigenetic silencing of engineered L1  
785 retrotransposition events in human embryonic carcinoma cells. *Nature* **466**,  
786 769–773 (2010).
- 787 51. S. Chen, Y. Zhou, Y. Chen, J. Gu, fastp: an ultra-fast all-in-one FASTQ  
788 preprocessor. *Bioinformatics* **34**, i884–890 (2018).
- 789 52. T. Magoč, S. L. Salzberg, FLASH: fast length adjustment of short reads to  
790 improve genome assemblies. *Bioinformatics* **27**, 2957–2963 (2011).
- 791 53. B. Langmead, S. L. Salzberg, Fast gapped-read alignment with Bowtie 2.  
792 *Nature methods* **9**, 357–359 (2012).
- 793 54. S. M. Kiełbasa, R. Wan, K. Sato, P. Horton, M. C. Frith, Adaptive seeds  
794 tame genomic sequence comparison. *Genome research* **21**, 487–493 (2011).
- 795 55. F. Ramírez *et al.*, deepTools2: a next generation web server for deep-  
796 sequencing data analysis. *Nucleic acids research* **44**, W160–W165 (2016).
- 797 56. A. Dobin *et al.*, STAR: ultrafast universal RNA-seq aligner. *Bioinformatics*  
798 **29**, 15–21 (2013).

- 799 57. A. Frankish *et al.*, GENCODE 2021. *Nucleic Acids Research* **49**, D916–D923  
800 (2020).
- 801 58. Y. Liao, G. K. Smyth, W. Shi, featureCounts: an efficient general purpose  
802 program for assigning sequence reads to genomic features. *Bioinformatics*  
803 **30**, 923–930 (2014).
- 804 59. Y. Hao *et al.*, Integrated analysis of multimodal single-cell data. *Cell*,  
805 (2021).
- 806 60. M. I. Love, W. Huber, S. Anders, Moderated estimation of fold change and  
807 dispersion for RNA-seq data with DESeq2. *Genome biology* **15**, 1–21 (2014).  
808

# Figure 1

Ten D. Li *et al.*

## Characterization of L1 ORF1p in mESCs and mouse preimplantation embryos

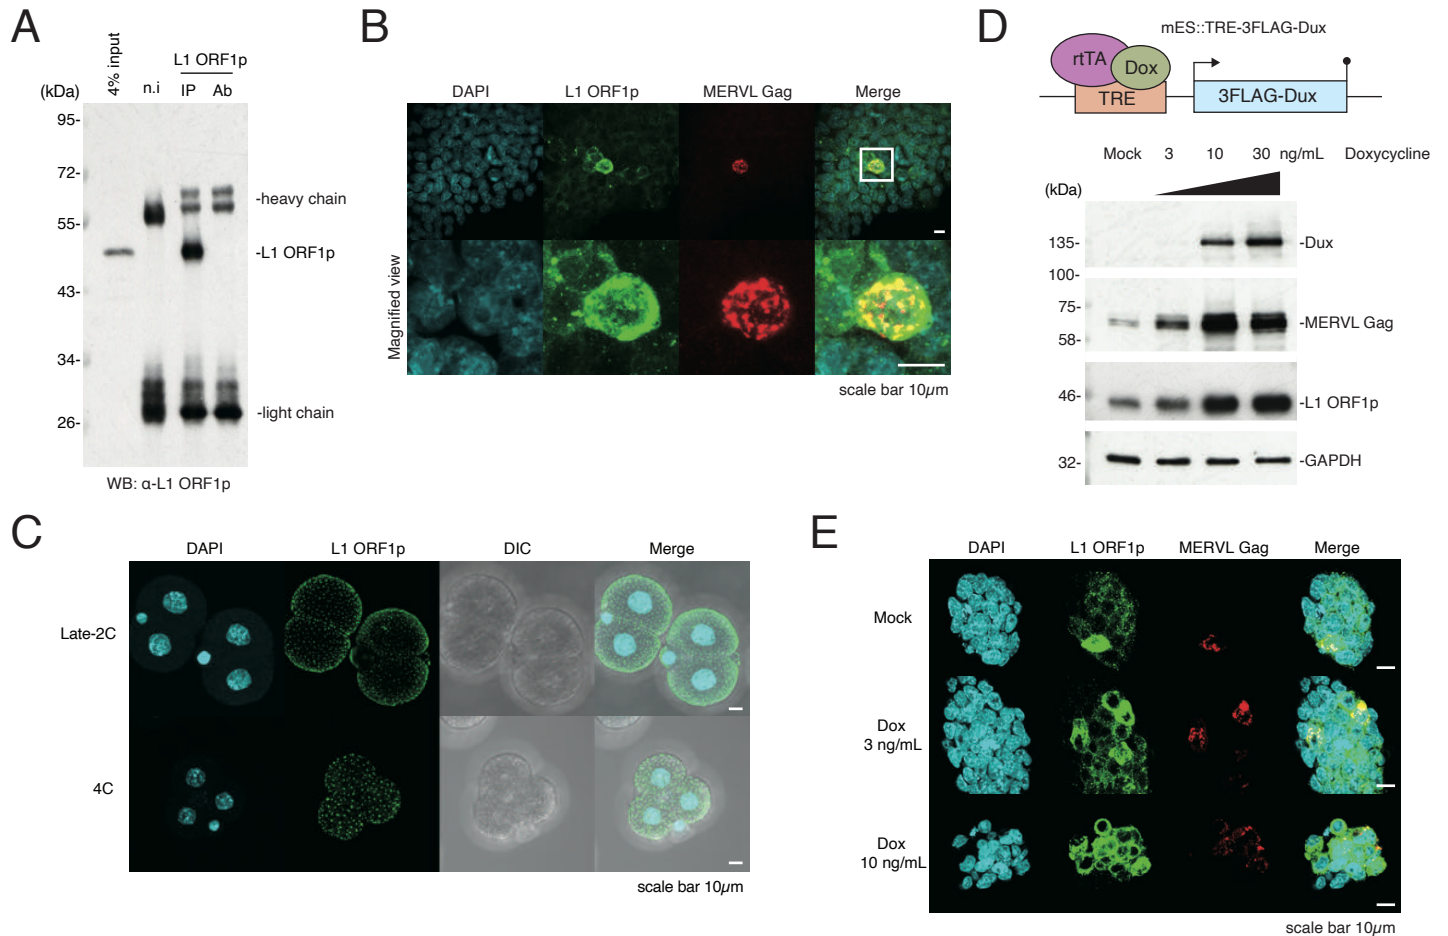

**Fig 1: Characterization of L1 ORF1p in mESCs and mouse preimplantation embryos**

**A.** IP of endogenous L1 ORF1p in wild type mESCs followed by WB. n.i, non-immunized mouse (IgG control); Ab, anti-body only. **B.** Immunofluorescence of wild type mESCs shows colocalization of endogenous L1 ORF1p and MERVL Gag in 2C-like cells. Images are maximal Z projections of confocal sections. **C.** Immunofluorescence of mouse embryos at late 2 cell (2C) stage and 4 cell (4C) stage. L1 ORF1p localized on the surface of the embryo with evenly scattered foci. Also see **fig. S1B**. Images are maximal Z projections of confocal sections. DIC, differential interference contrast microscope. **D.** (Upper panel) Scheme of mES::TRE-3FLAG-Dux cell line construct. 3FLAG-Dux is inserted after the TRE promoter, which drives downstream gene expression upon induction by doxycycline. (Lower panel) MERVL Gag and L1 ORF1p are up-regulated in mES::TRE-3FLAG-Dux cell line in a doxycycline dose-dependent manner. **E.** Immunofluorescence of mES::TRE-3FLAG-Dux cells. Images are maximal Z projections of confocal sections. Proportion of cells expressing L1 ORF1p and MERVL Gag were increased in a doxycycline dose-dependent manner.

## Figure 2

Ten D. Li *et al.*

### TDP-43 interacts with L1 ORF1p and inhibits L1 retrotransposition

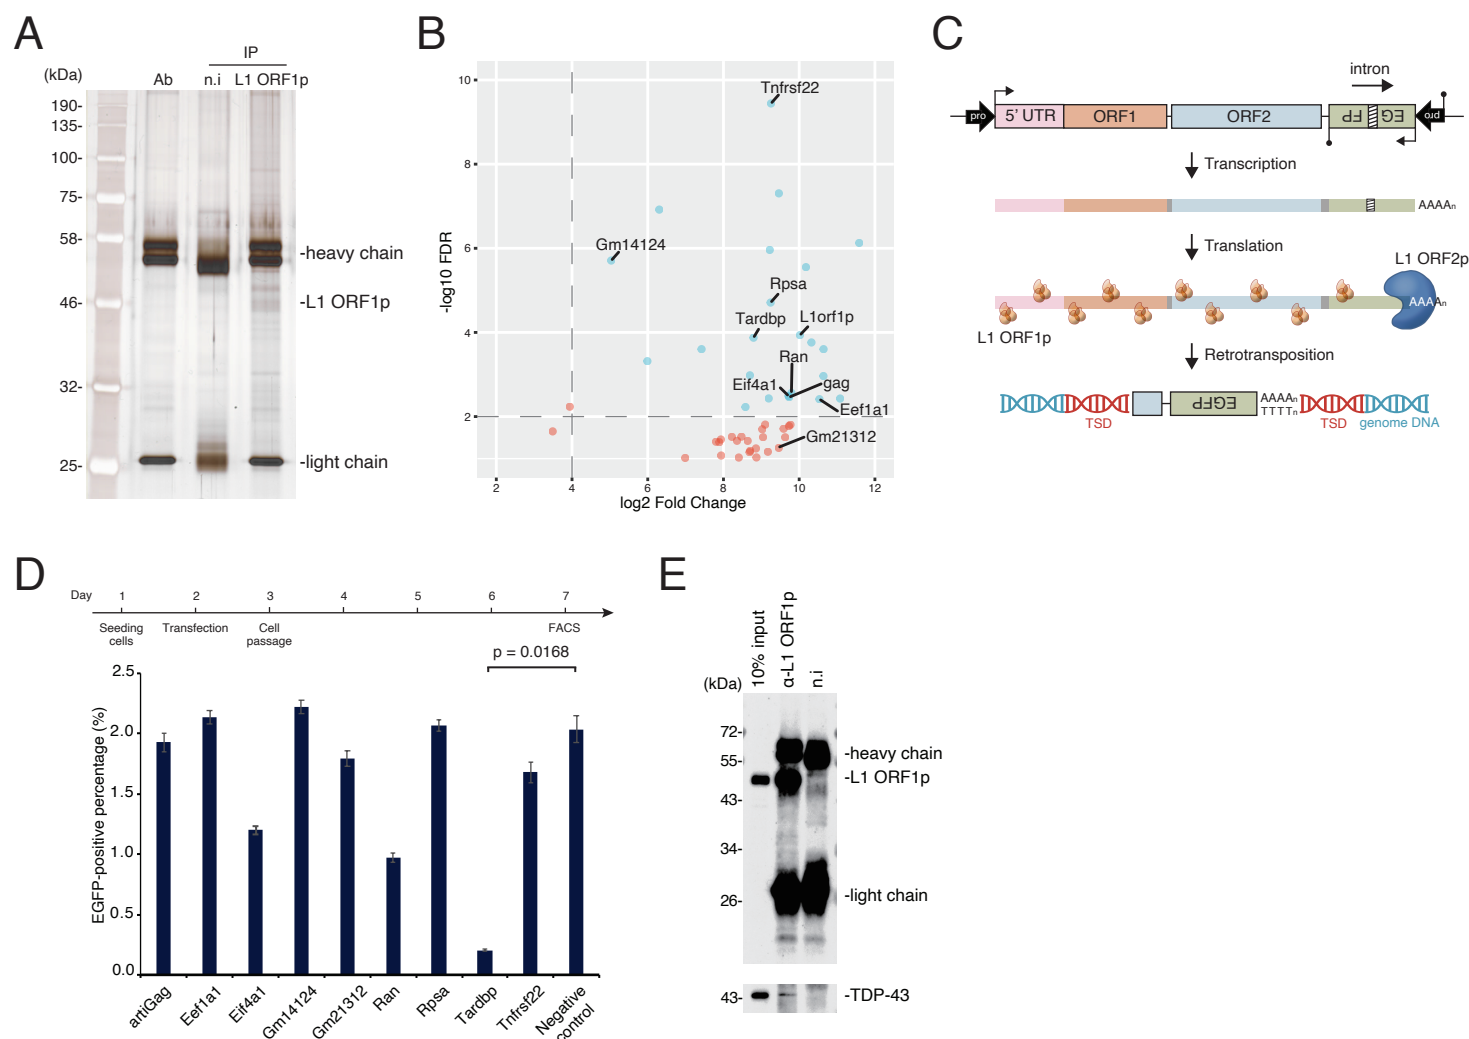

**Fig 2: TDP-43 interacts with L1 ORF1p and inhibits L1 retrotransposition**

**A.** Silver staining of L1 ORF1p interacting proteins co-IPed from mES::TRE-3FLAG-Dux cells after doxycycline induction. Ab, antibody only; n.i, non-immunized mouse IgG (IgG control). **B.** Volcano plot showing interactome of L1 ORF1p identified by LC-MS/MS. Horizontal axis: log<sub>2</sub> fold change of protein signal enrichment in anti-L1 ORF1p co-IP product versus non-immunized IgG co-IP product; vertical axis:  $-\log_{10}$  false discovery rate (FDR). Blue dots represent highly enriched proteins in the L1 ORF1p interactome. Proteins that were selected for further screening are labeled. **C.** Scheme of the retrotransposition assay. The bivalent reporter plasmid (cep99-gfp-ORFeus-Mm (EF1 $\alpha$ EF1 $\alpha$ ), see **Materials and Methods**) encodes a transposition-competent L1 followed by an anti-sense EGFP cassette interrupted by an intron. Once transcribed, the intron is spliced and the mature mRNA containing an uninterrupted anti-sense EGFP cassette can be inserted into the host genome, leading to EGFP-positive cells. TSD, target site duplication. **D.** Effects of L1 ORF1p interactors on L1 retrotransposition was examined by fluorescence-activated cell sorting (FACS) of HEK293T cells subjected to retrotransposition assay with ectopic expression of candidate proteins in **B**. Over-expression of TDP-43 markedly repressed L1 retrotransposition. Negative control representing cells transfected with empty vector. **E.** IP of L1 ORF1p followed by WB using mES::TRE-3FLAG-Dux lysate. Interaction of endogenous L1 ORF1p and TDP-43 was confirmed.

## Figure 3

Ten D. Li *et al.*

### Zygotic TDP-43 KD leads to increased L1 retrotransposition

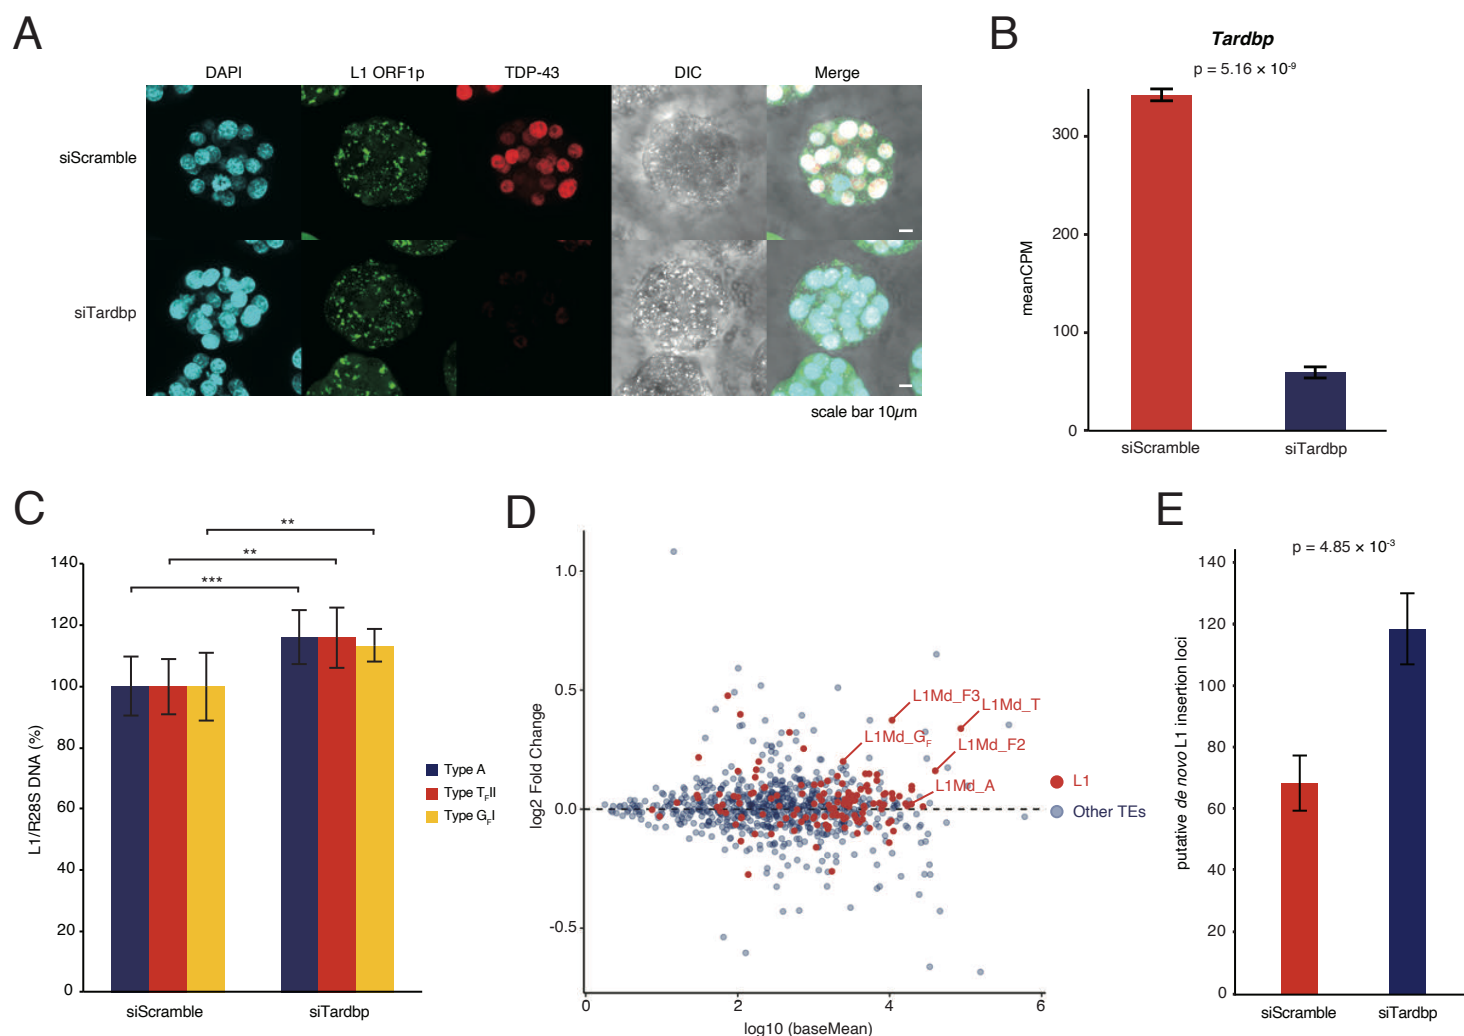

### Fig 3: Zygotic TDP-43 KD leads to increased L1 retrotransposition

**A.** Immunofluorescence of zygotes injected with control (siScramble) or TDP-43 (siTardbp) targeting siRNA. TDP-43 KD morulae show strongly decreased TDP-43 signal. Images are maximal Z projections of confocal sections. **B.** Expression level of *Tardbp* as assessed by RNAseq with and without KD. **C.** qPCR using primer sets targeting active L1 subfamilies (29) with WGA DNA from five blastocysts (4.5 dpc) +/- TDP-43 KD as template. Expression of active L1 subfamilies was increased in TDP-43 KD embryos. \*\*, p value  $\leq 0.01$ ; \*\*\*, p value  $\leq 0.001$ . **D.** MA plot showing expression change of TEs in TDP-43 KD embryos. Horizontal axis: log<sub>10</sub> normalized read count (baseMean); vertical axis: log<sub>2</sub> fold change of expression level in KD embryos versus control embryos. L1 elements are highlighted in red. Here we adopted L1 classification of repeat masker in RNA-seq analysis, so L1Md\_A corresponds to subfamily L1MdA\_I, L1Md\_AII and L1Md\_AIII; L1Md\_T corresponds to subfamily T<sub>F</sub> and G<sub>F</sub>; L1Md\_F2 corresponds to L1Md\_AIV, L1Md\_AVII and L1Md\_F; L1Md\_F3 corresponds to the remaining A subfamily and partial of subfamily L1Md\_N\_I (30). **E.** Targeted enrichment sequencing was used to detect previously un-annotated putative L1 insertion sites in TDP-43 KD embryos (4.5 dpc) and in control embryos (4.5 dpc).

# Figure 4

Ten D. Li *et al.*

## TDP-43 mutation in mESCs results in increased L1 retrotransposition

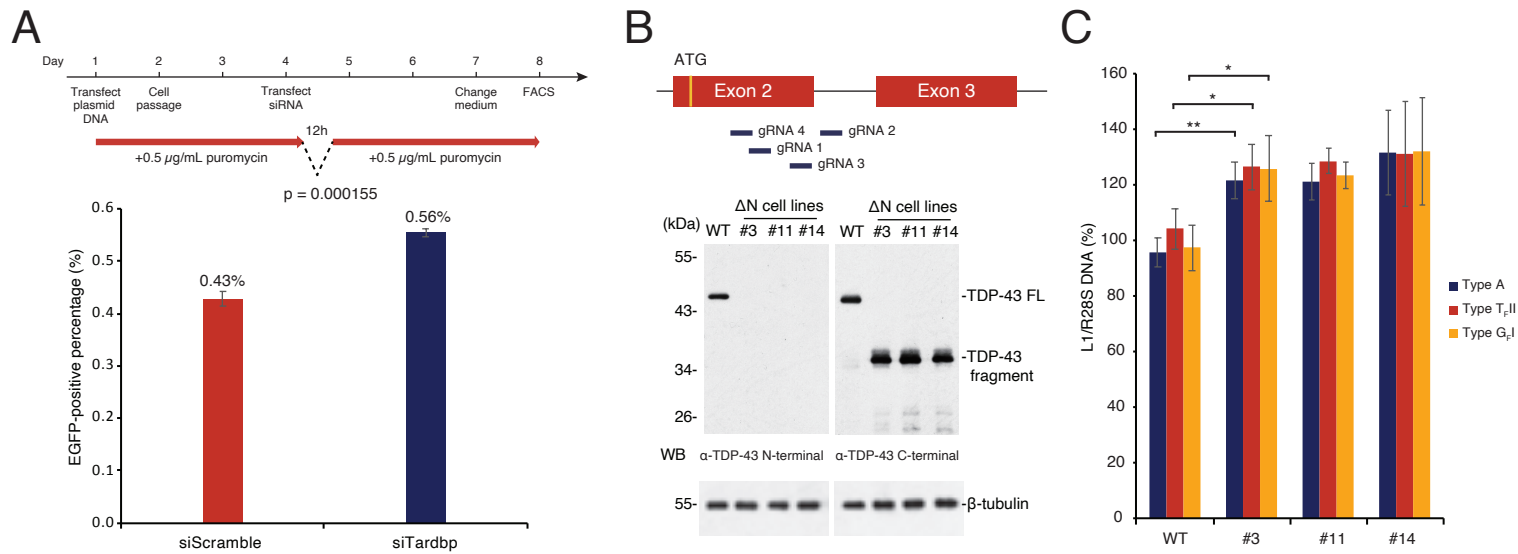

**Fig 4: TDP-43 mutation in mESCs results in increased L1 retrotransposition**

**A.** mESCs treated with control and Tardbp-targeting siRNA were used for the retrotransposition assay (see **Fig. 2C**) and analyzed by FACS. The experimental time course is shown above. Retrotransposition frequency was increased in cells transfected with siTardbp compared with siScramble. **B.** Strategy to knock out TDP-43 using CRISPR/Cas9 with four gRNAs is illustrated in the upper panel. The resulting clones are annotated as TDP-43 ΔN cell lines (#3, #11, #14). These three mono-cloned lines were isolated and N terminal truncated TDP-43 was detected by WB using anti-TDP-43 C terminal antibody. See also **fig. S4, C** and **D.** **C.** qPCR using primer sets targeting each active L1 subfamily (29) was performed on wild type and ΔN lines. The expression of active L1 subfamilies was increased in TDP-43 ΔN mESCs. \*, p value ≤ 0.05; \*\*, p value ≤ 0.01.

# Figure 5

Ten D. Li *et al.*

## Interaction with L1 ORF1p is required for TDP-43-mediated L1 retrotransposition

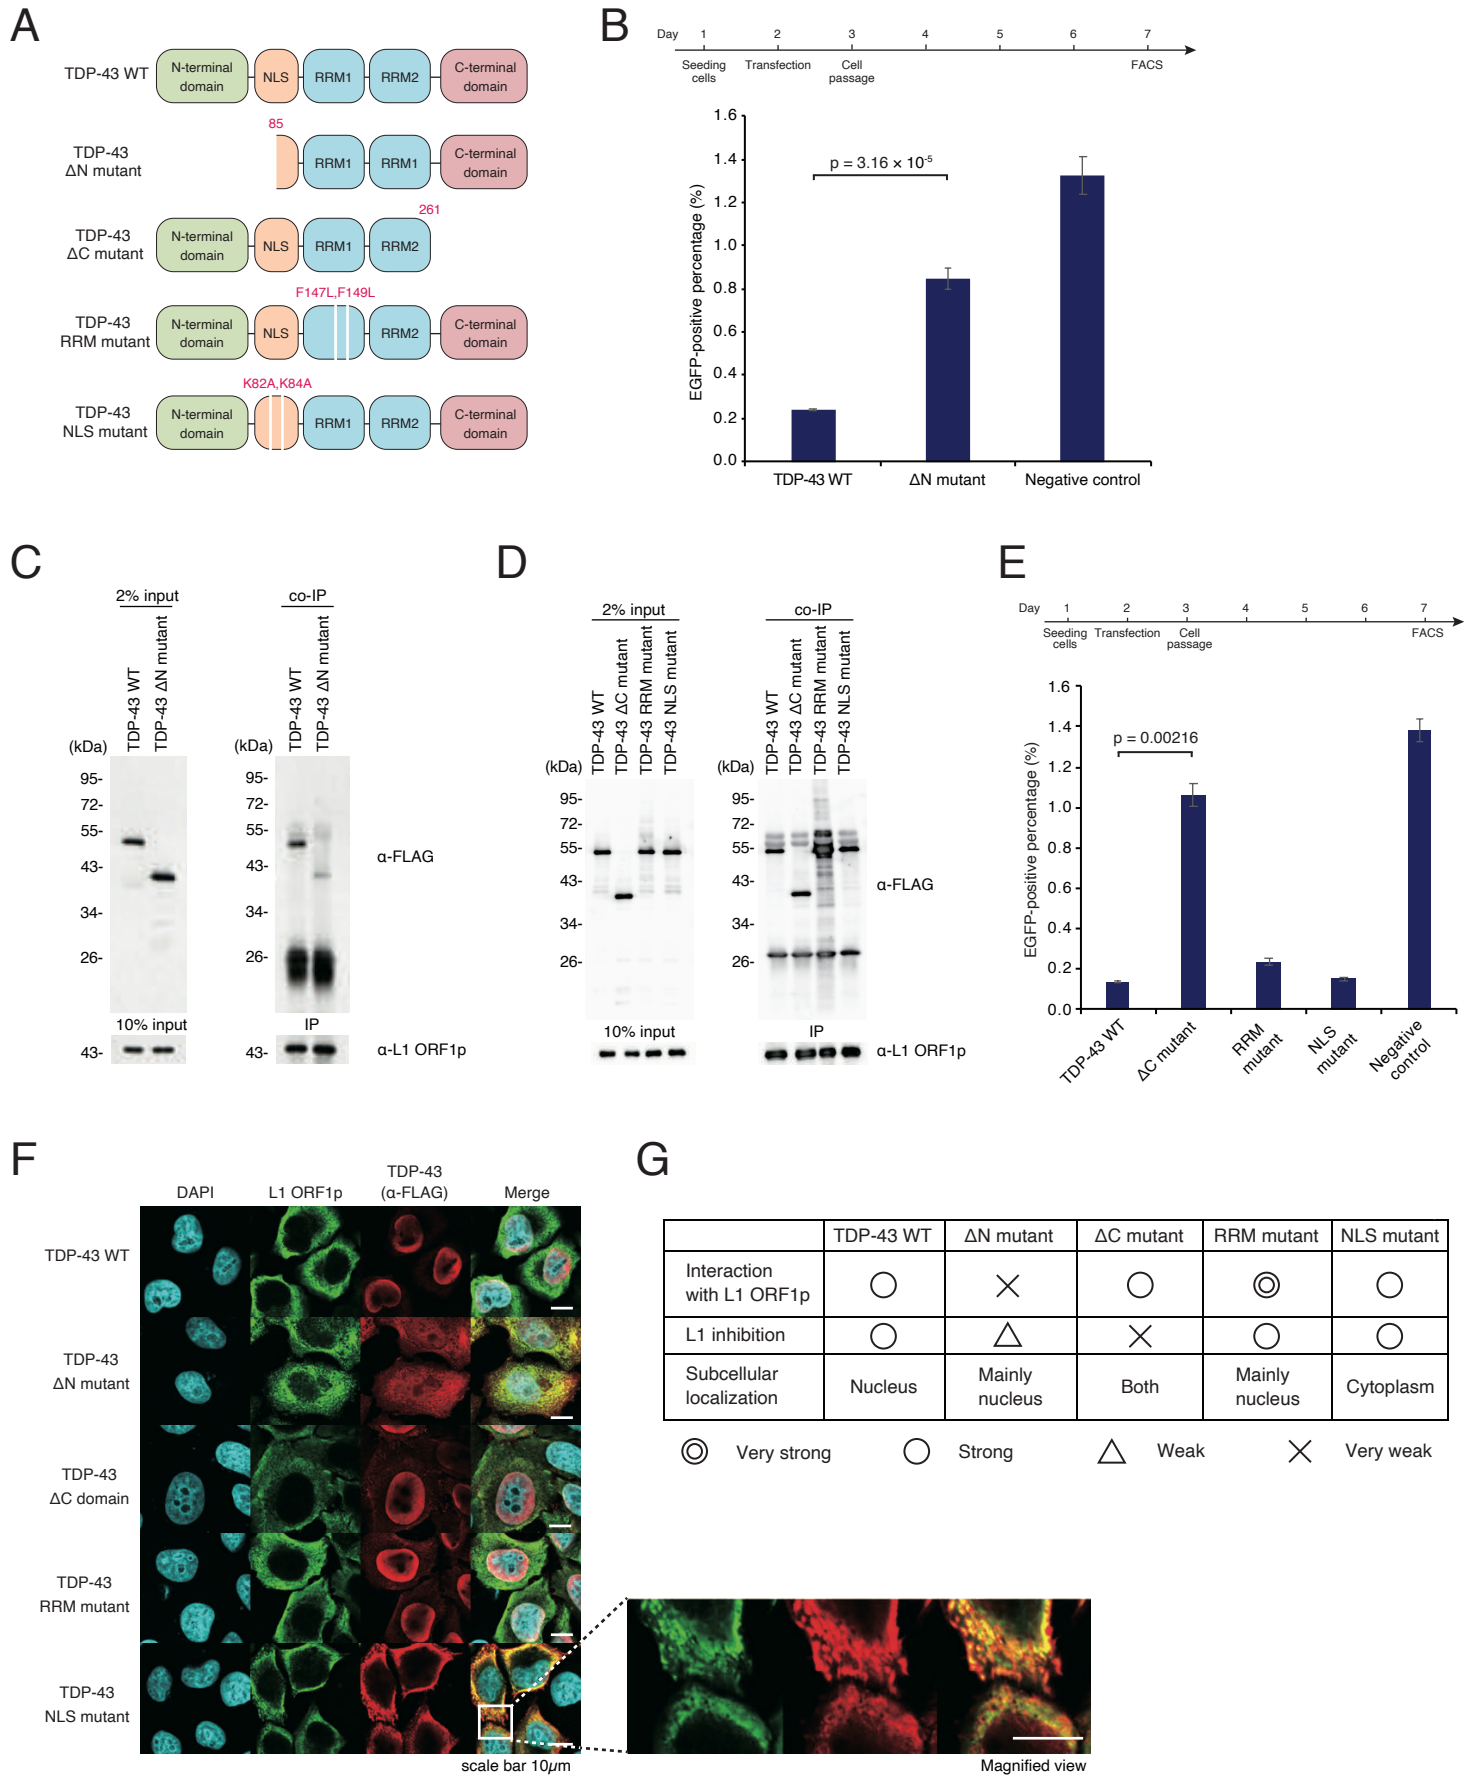



**Fig 5: Interaction with L1 ORF1p is required for TDP-43-mediated L1 retrotransposition**

**A.** Illustration of TDP-43 mutants used in this study. **B.** The FACS-based retrotransposition assay (see **Fig. 2C**) showed that retrotransposition frequency was higher in HEK293T cells with ectopic expression of the TDP-43  $\Delta$ N mutant compared to the full-length TDP-43. The experimental time course is shown in the upper panel. **C.** The interaction between the FLAG-tagged TDP-43  $\Delta$ N mutant and L1 ORF1p was examined by co-IP of L1 ORF1p in HEK293T cells. The interaction between TDP-43  $\Delta$ N mutant and L1 ORF1p was compromised relative to wild type TDP-43. **D.** The interaction between FLAG-tagged TDP-43 mutants (**A**) and L1 ORF1p was examined by co-IP of L1 ORF1p in HEK293T cells. Loss of either the C terminal domain or mutation of the NLS did not affect TDP-43' s interaction with L1 ORF1p. **E.** L1 retrotransposition frequency in HEK293T cells over-expressing TDP-43 mutants. Experimental time course is shown above. Inhibition of retrotransposition by TDP-43 was compromised by loss of the C terminal domain but not other mutations. **F.** Subcellular localization of L1 ORF1p and TDP-43 mutants in HeLa cells by immunofluorescence staining. The TDP-43 NLS mutant was localized to the cytoplasm, with significant overlap with L1 ORF1p. **G.** Summary table of the characteristics of TDP-43 mutants.
